# Supplementary material for: Clonal copy-number mosaicism in autoreactive T lymphocytes in diabetic NOD mice
Source: Genome Res. 2019 Dec;29(12):1951–61. doi: 10.1101/gr.247882.118 (PMC6886509; doi:10.1101/gr.247882.118)
Supplement: Supplemental Material [file supp_gr.247882.118_Supplemental_Data_S2.xlsx]

## Sheet: Sheet2
# List of CNAs in memory CD4+ lymphocytes of PLN in 19 tested diabetic mice with normal sorting profile (ADM2: mean LRR |0.25| and P-value <2.90 x 10-07 and CBS: mean LRR |0.25| and P-value <1 x 10-04). Since we have no prior information in which to base power calculations the number of mice tested was determined by available funds.
NO.	ID	chrom	chrom	chr region	loc.start	loc.end	num.mark	Amplification	Deletions	mean LRR	pval	Genes
6412	M3	chr8	8	qB3.3	72718314	72795346	9	0.474046	0	0.474046	1.176e-10	Slc25a42, Armc6, Sfrs14
5883	M4	chr2	2	qC3	74475401	74598078	15	0	-0.3411	-0.3411	8.553e-10	Evx2, Hoxd13, Hoxd12, Hoxd11, Hoxd10, Hoxd9, Hoxd8, 1700109F18Rik, Hoxd3, Hoxd4
5887	M4	chr6	6	qB3	52104495	52281548	18	0	-0.35059	-0.35059	7.064e-12	Hoxa1, Hoxa2, Hoxa3, Hoxa4, Hoxa5, Hoxa6, Hoxa7, Hoxa9, Hoxa10, Hoxa11, Hoxa11as, Hoxa13, Evx1
5888	M4	chr10	10	qC1	79084598	81041680	203	0	-0.253642	-0.253642	2.315e-62	Shc2, Odf3l2, Madcam1, Gtrgeo22, Cdc34, Gzmm, Bsg, Hcn2, Polrmt, Fgf22, Rnf126, Fstl3, Prssl1, Palm, 9130017N09Rik, Ptbp1, BC005764, Prtn3, Ela2, Cfd, Med16, C030046I01Rik, Kiss1r, Arid3a, Wdr18, Grin3b, ORF61, Cnn2, Abca7, Hmha1, Polr2e, Gpx4, Sbno2, Stk11, Dos, Atp5d, Midn, Cirbp, 1600002K03Rik, Efna2, Mum1, Ndufs7, Gamt, Dazap1, Rps15, Apc2, 2310011J03Rik, Pcsk4, Reep6, Adamtsl5, Plk5, Mex3d, …
6031	M5	chr14	14	qC1 - qC2	52061318	52152579	8	0	-0.468412	-0.468412	1.466e-10	Gm7247, Vmn2r89
6043	M7	chr12	12	qF1	110259036	110803088	28	0	-0.286577	-0.286577	3.706e-10	Wdr25, Begain, Dlk1, Meg3
6431	M10	chr8	8	qB3.3	72706464	72777429	8	0.509067	0	0.509067	3.827e-10	Tmem161a, Slc25a42, Armc6, Sfrs14
6055	M12	chr2	2	qC3	74501193	74598078	13	0	-0.421032	-0.421032	2.327e-12	Hoxd13, Hoxd12, Hoxd11, Hoxd10, Hoxd9, Hoxd8, 1700109F18Rik, Hoxd3, Hoxd4
6056	M12	chr4	4	qE2	148271563	148338029	6	0	-0.531873	-0.531873	6.579e-10	Casz1, Pex14
6057	M12	chr5	5	qA3	23846753	24135248	31	0	-0.29753	-0.29753	3.208e-15	Kcnh2, Nos3, Atg9b, Abcb8, Accn3, Cdk5, Slc4a2, Fastk, Tmub1, Agap3, Gbx1, Asb10, 4931409K22Rik, Abcf2, Chpf2, Smarcd3
6060	M12	chr6	6	qB3	52116749	52207847	9	0	-0.482734	-0.482734	1.648e-11	Hoxa3, Hoxa4, Hoxa5, Hoxa6, Hoxa7, Hoxa9, Hoxa10, Hoxa11, Hoxa11as
6803	M16	chr5	5	qA3	23764189	24135248	39	0	-0.279024	-0.279024	1.088e-10	Kcnh2, Nos3, Atg9b, Abcb8, Accn3, Cdk5, Slc4a2, Fastk, Tmub1, Agap3, Gbx1, Asb10, 4931409K22Rik, Abcf2, Chpf2, Smarcd3
6805	M16	chr7	7	qB1	31309621	31448527	18	0	-0.360452	-0.360452	9.433e-10	Snx26, BC053749, Hspb6, Lin37, Psenen, U2af1l4, Tmem149, Wbp7, Zbtb32, Upk1a, Cox6b1, Etv2, Rbm42, Haus5
6016	M18	chrY	Y	qA1	1846529	2506368	7	0	-0.696958	-0.696958	6.488e-15	Gm16501, Sry, Rbmy1a1
