# Supplementary material for: Clonal copy-number mosaicism in autoreactive T lymphocytes in diabetic NOD mice
Source: Genome Res. 2019 Dec;29(12):1951–61. doi: 10.1101/gr.247882.118 (PMC6886509; doi:10.1101/gr.247882.118)
Supplement: Supplemental Material [file supp_gr.247882.118_Supplemental_Data_S3.xlsx]

## Sheet: Sheet1
# List of CNAs in the CD4+ lymphocytes from PNL of the six animals in which all cells were memory, CD62Lneg, CD44+ (M20-M25). M23 and M25 had the largest number of CNAs indicating an unstable genome.
NO.	ID	chrom	chrom	chr region	loc.start	loc.end	num.mark	Amplification	Deletions	mean LRR	pval	Genes
5931	M22	chr3	3	qF2.1	94767165	94821010	7	0.485703	0	0.485703	6.816e-10	Pi4kb, Zfp687
5938	M22	chr11	11	qB3	68880665	68909840	4	0.790815	0	0.790815	2.009e-14	Tmem107, Vamp2
5941	M22	chr13	13	qA3.1	21798640	21921804	13	0.395523	0	0.395523	7.92e-12	Hist1h2bl, Hist1h2ai, Hist1h3h, Hist1h2bm, Hist1h4j, Hist1h4k, Hist1h2ak, Hist1h2bn, Hist1h1b, Hist1h3i, Hist1h2an, Hist1h2bp, LOC665622, OTTMUSG00000013203, Hist1h2ao, Hist1h4m
5942	M22	chr13	13	qA3.1	23648864	23661397	3	0.860912	0	0.860912	1.109e-11	Hist1h1d, Hist1h3e
5943	M22	chr14	14	qC1 - qC2	52061318	52145237	7	0	-0.567054	-0.567054	6.918e-13	Gm7247, Vmn2r89
171	M23	chr1	1	qB	36503701	36617344	12	1.34827	0	1.34827	1.502e-65	Cnnm4, Cnnm3, Ankrd23, Ankrd39, Sema4c
172	M23	chr1	1	qC2	64163925	64184658	3	0.996945	0	0.996945	1.457e-10	Klf7
174	M23	chr1	1	qC3 - qC4	75145560	75336820	21	0.502374	0	0.502374	2.103e-17	Zfand2b, Abcb6, Atg9a, Ankzf1, Glb1l, Stk16, Tuba4a, Dnajb2, Ptprn, Resp18, Dnpep
175	M23	chr1	1	qD	88220343	88486976	23	0.666803	0	0.666803	8.11e-32	Ncl, Snord82, Nmur1, 1700019O17Rik, Ptma, Pde6d, Cops7b
176	M23	chr1	1	qD	93127340	93347023	23	0.985482	0	0.985482	8.503e-65	Ube2f, Scly, Espnl, Klhl30, Fam132b, Ilkap, 1700020N18Rik, Hes6, Per2
177	M23	chr1	1	qD	95194949	95466157	32	0.691444	0	0.691444	1.339e-46	Mterfd2, Pask, Ppp1r7, Ano7, Hdlbp, Sept2, Farp2
178	M23	chr1	1	qE4	133405674	133461744	6	0.814173	0	0.814173	1.648e-13	Srgap2, Fam72a
179	M23	chr1	1	qE4	135961313	136028652	8	0.958129	0	0.958129	2.141e-23	Btg2, Chit1
180	M23	chr1	1	qG3	156935025	156998380	9	0.892209	0	0.892209	7.97e-23	Ier5, Mr1
181	M23	chr1	1	qH2.3	167515575	167634731	13	0.585428	0	0.585428	6.413e-15	Mpzl1, Rcsd1
182	M23	chr1	1	qH3	171879998	172067400	18	0.41261	0	0.41261	8.277e-11	Hsd17b7, Ddr2
183	M23	chr1	1	qH3	173156460	173313303	16	0.754672	0	0.754672	1.448e-28	Apoa2, Fcer1g, Ndufs2, Adamts4, B4galt3, Ppox, Usp21, Ufc1, Dedd, Nit1, Pfdn2, Klhdc9, Pvrl4
185	M23	chr1	1	qH6	193146204	193769254	56	0.405128	0	0.405128	1.216e-28	Tmem206, Ppp2r5a, Dtl, Ints7, Lpgat1, Nek2, Slc30a1
186	M23	chr2	2	qA1	3326658	3460492	14	0.595535	0	0.595535	2.026e-16	Meig1, Dclre1c, Suv39h2, Hspa14, Cdnf
190	M23	chr2	2	qB	29706837	30335662	64	0.599361	0	0.599361	6.246e-69	Cercam, Odf2, Gle1, Spna2, Wdr34, Set, Pkn3, Zdhhc12, Zer1, Tbc1d13, Endog, D2Wsu81e, Ccbl1, 1700084E18Rik, Lrrc8a, Phyhd1, Dolk, Nup188, Sh3glb2, Fam73b, Dolpp1, Crat, Ppp2r4, Ier5l
191	M23	chr2	2	qB	30231835	30304849	8	1.28938	0	1.28938	5.853e-13	Fam73b, Dolpp1, Crat, Ppp2r4
193	M23	chr2	2	qB	32275427	32382803	10	1.00485	0	1.00485	7.964e-10	Slc25a25, Naif1
194	M23	chr2	2	qB	34605928	34652887	5	1.03265	0	1.03265	1.695e-17	Gapvd1, Hspa5, Rabepk
196	M23	chr2	2	qC1.1	52918437	53167467	24	0.37251	0	0.37251	1.348e-11	Fmnl2, Prpf40a, Arl6ip6
197	M23	chr2	2	qC3	75395873	75544907	12	0.490615	0	0.490615	2.758e-10	Hnrnpa3, Nfe2l2
198	M23	chr2	2	qD	84479654	84612390	13	0.730203	0	0.730203	3.453e-22	Ctnnd1, Gm13718, 2700094K13Rik, Txndc14, Med19, Zdhhc5, Clp1, Ypel4, Serping1
200	M23	chr2	2	qE1	92209084	92288997	9	0.717189	0	0.717189	1.974e-15	Gyltl1b, Pex16, 1700029I15Rik, Mapk8ip1, Cry2
201	M23	chr2	2	qE2	103298789	103417743	8	0.770814	0	0.770814	8.519e-16	Cat, Abtb2
202	M23	chr2	2	qE3	105670148	105755474	9	0.583789	0	0.583789	8.118e-11	Elp4, Immp1l
204	M23	chr2	2	qE5	119365664	119455924	12	1.1111	0	1.1111	3.445e-45	Exd1, 1500003O03Rik, 1700020I14Rik, Oip5, Nusap1
205	M23	chr2	2	qE5	121096018	121281283	21	1.06414	0	1.06414	3.388e-71	Trp53bp1, Mtap1a, Hisppd2a, Ckmt1, Strc, Catsper2, Pdia3, Ell3, Serf2, Serinc4
206	M23	chr2	2	qF1	127004358	127124309	12	0.643761	0	0.643761	1.921e-16	Snrnp200, Ciao1, Tmem127, Stard7
207	M23	chr2	2	qF1	127904068	127975791	7	0.701258	0	0.701258	6.279e-12	Acoxl, Bcl2l11
208	M23	chr2	2	qF1	130991074	131126299	14	0.881717	0	0.881717	9.786e-34	Spef1, Cenpb, Cdc25b, 2310035K24Rik, Mavs, Pank2, Rnf24
210	M23	chr2	2	qH1	152657878	152699043	4	0.839291	0	0.839291	4.478e-10	Tpx2
211	M23	chr2	2	qH1	154271883	154387627	13	0.490308	0	0.490308	5.464e-11	Cbfa2t2, Necab3, 1700003F12Rik, E2f1
212	M23	chr2	2	qH1	154396040	154442189	5	1.88695	0	1.88695	2.027e-46	Pxmp4, Zfp341
213	M23	chr2	2	qH3	164527709	164708702	20	0.976282	0	0.976282	1.502e-57	Spint4, Gm14316, Wfdc3, Dnttip1, Ube2c, Tnnc2, Snx21, Acot8, Zswim3, Zswim1, 1700020C07Rik, Neurl2, Ctsa, Pltp, Pcif1
214	M23	chr2	2	qH3	164600494	164641540	5	1.78452	0	1.78452	2.087e-11	Tnnc2, Snx21, Acot8, Zswim3
216	M23	chr2	2	qH4	179746352	180189103	45	0.573341	0	0.573341	9.08e-45	Lsm14b, Psma7, Ss18l1, Gtpbp5, Hrh3, Osbpl2, Adrm1, Lama5, Rps21, Cables2, BC066135, Gata5
218	M23	chr3	3	qA2	19064447	19123792	8	0.952194	0	0.952194	3.944e-23	Mtfr1
219	M23	chr3	3	qA3	27026426	27078912	6	0.71889	0	0.71889	5.325e-10	Ect2
220	M23	chr3	3	qA3	32578869	32623867	4	0.917167	0	0.917167	6.451e-11	Actl6a
221	M23	chr3	3	qF1	87875723	88320684	47	0.40236	0	0.40236	3.947e-24	Ttc24, Iqgap3, Mef2d, Rhbg, 1700021C14Rik, Cct3, 0610031J06Rik, Tmem79, Smg5, Paqr6, Bglap-rs1, Bglap2, Bglap1, Pmf1, Slc25a44, Sema4a, Lmna
222	M23	chr3	3	qF1	88856521	88964570	12	0.659978	0	0.659978	3.449e-17	Ash1l, Rusc1, Fdps, Pklr, Hcn3
223	M23	chr3	3	qF1	89199720	89234878	5	1.42139	0	1.42139	1.873e-31	Lenep, Flad1, Cks1b, Shc1, Pygo2
224	M23	chr3	3	qF1	90072599	90314045	27	0.798966	0	0.798966	3.102e-52	Dennd4b, Gatad2b, Slc27a3, Ints3, Npr1, Ilf2, Snapin, 2500003M10Rik
225	M23	chr3	3	qF2.1	94667476	96399306	174	0.635965	0	0.635965	3.867e-206	Pogz, Psmb4, Selenbp1, Rfx5, Pi4kb, Zfp687, Psmd4, Pip5k1a, Vps72, Tmod4, Scnm1, Lysmd1, Tnfaip8l2, Sema6c, Gabpb2, Mllt11, Cdc42se1, Gm128, Bnipl, Prune, Fam63a, Anxa9, Lass2, Setdb1, 4930558C23Rik, Arnt, Ctsk, Ctss, Hormad1, Golph3l, Ensa, Mcl1, Adamtsl4, Ecm1, Tars2, Rprd2, Prpf3, Mrps21, Gm129, BC028528, Aph1a, Car14, Anp32e, Plekho1, Vps45, Otud7b, Mtmr11, Sf3b4, Sv2a, Bola1, Hist2h2ab, Hist…
226	M23	chr3	3	qF2.1	94759757	94857185	12	1.46837	0	1.46837	3.1e-26	Rfx5, Pi4kb, Zfp687, Psmd4
228	M23	chr3	3	qF2.1	95679706	95744139	9	1.29143	0	1.29143	3.495e-13	Gm129, BC028528, Aph1a, Car14, Anp32e
229	M23	chr3	3	qF2.1	96012726	96069190	6	1.7275	0	1.7275	1.193e-22	Hist2h2ab, Hist2h2ac, Hist2h2be, Hist2h3c2, Hist2h3c1, Hist2h2aa1, Hist2h2aa2, Hist2h4
230	M23	chr3	3	qF2.2	100648887	100779147	13	0.524805	0	0.524805	2.45e-12	Vtcn1, Trim45, Ttf2
231	M23	chr3	3	qG3	135060963	135090752	5	0.838265	0	0.838265	3.868e-12	Cisd2
233	M23	chr4	4	qA5	41303485	41454957	17	0.557374	0	0.557374	2.386e-17	Ubap1, Kif24, Nudt2, AI464131, 1110017D15Rik
234	M23	chr4	4	qA5	42960366	43071029	12	1.07645	0	1.07645	1.534e-42	Dnajb5, 1700022I11Rik, Vcp, Fancg, Pigo, Stoml2, B230312A22Rik
235	M23	chr4	4	qB1	44956141	45056026	11	0.591038	0	0.591038	4.117e-13	Grhpr, Zbtb5, Polr1e, Fbxo10
236	M23	chr4	4	qB1	46466992	46553140	9	0.636181	0	0.636181	1.606e-12	Anp32b, Nans, Trim14, Coro2a
238	M23	chr4	4	qC7	108672012	108798956	14	1.24561	0	1.24561	2.788e-65	Nrd1, Osbpl9
240	M23	chr4	4	qD1	114615652	114709283	11	0.56203	0	0.56203	5.038e-12	Cmpk1, Stil
241	M23	chr4	4	qD1	116364137	116466983	13	0.788577	0	0.788577	1.158e-17	Prdx1, Mmachc, 0610037D15Rik, Tesk2
242	M23	chr4	4	qD2.1	117813491	117876094	7	1.15971	0	1.15971	5.262e-23	Kdm4a
243	M23	chr4	4	qD2.1	118759284	119076632	31	0.726074	0	0.726074	1.527e-32	Slc2a1, Zfp691, Ermap, Ccdc23, 4930538K18Rik, AU022252, Lepre1, Cldn19, Ybx1, Ppih, Ccdc30
244	M23	chr4	4	qD2.2	120450783	120526655	10	0.731512	0	0.731512	6.271e-12	Nfyc
246	M23	chr4	4	qD2.2	126350864	126471171	14	0.596134	0	0.596134	3.537e-10	Psmb2, Tcfap2e, Ncdn, AU040320
248	M23	chr4	4	qD2.2	129019114	129299035	30	0.85803	0	0.85803	1.719e-46	Zbtb8os, Zbtb8a, Zbtb8b, Bsdc1, Tssk3, 1700125D06Rik, Marcksl1, Hdac1, Lck, Fam167b, Eif3i, 2510006D16Rik, Iqcc, Ccdc28b
251	M23	chr4	4	qD3	134322506	135004897	55	0.426465	0	0.426465	1.192e-14	Ldlrap1, Tmem57, Rhd, Tmem50a, D4Wsu53e, Syf2, Runx3, Clic4, Srrm1, A330049M08Rik, Rcan3, Nipal3
253	M23	chr4	4	qD3	137777067	137884856	14	0.637974	0	0.637974	1.425e-18	Hp1bp3, Sh2d5, Kif17, Ddost, Pink1
254	M23	chr4	4	qD3	139149848	139235816	10	0.629434	0	0.629434	1.83e-13	Iffo2, Aldh4a1, Tas1r2
255	M23	chr4	4	qE2	147826917	147965105	15	0.82774	0	0.82774	5.76e-32	Mtor, Angptl7, Exosc10
258	M23	chr4	4	qE2	151205425	151264151	7	0.890396	0	0.890396	3.888e-18	Camta1
260	M23	chr5	5	qA3	20367300	20548127	18	0.771356	0	0.771356	3.152e-33	Phtf2, Tmem60, Rsbn1l, Ptpn12
261	M23	chr5	5	qB1	31016567	31826213	75	0.278044	0	0.278044	1.114e-18	Dpysl5, Mapre3, Tmem214, Agbl5, 2310016E02Rik, Emilin1, Khk, Cgref1, Abhd1, Preb, Tcf23, Slc5a6, 0610007C21Rik, Cad, Slc30a3, Dnajc5g, Trim54, Ucn, Mpv17, Gtf3c2, Eif2b4, Snx17, Zfp513, Ppm1g, Nrbp1, Krtcap3, Ift172, Fndc4, Gckr, Zfp512, 4930548H24Rik, Gpn1, Supt7l
262	M23	chr5	5	qB1 - qB2	33624527	34986581	132	0.290132	0	0.290132	2.125e-34	Maea, 4933407H18Rik, Fam53a, Slbp, Tmem129, Tacc3, Fgfr3, Letm1, Whsc1, Whsc2, Gm1673, Nat8l, Poln, BC023882, Mxd4, Zfyve28, Rnf4, BC037112, Tnip2, Sh3bp2, Add1, Mfsd10, Nop14
264	M23	chr5	5	qB3	36797005	36921007	13	0.55001	0	0.55001	6.72e-13	Grpel1, Ccdc96, Tbc1d14
265	M23	chr5	5	qC3.2 - qC3.3	73616435	73907085	31	0.496776	0	0.496776	2.719e-24	Fryl, Ociad1, Ociad2, C130090K23Rik, Dcun1d4
266	M23	chr5	5	qC3.3	74443234	74548549	10	0.809964	0	0.809964	4.219e-21	Usp46
267	M23	chr5	5	qE2	92464792	92504843	6	0.785666	0	0.785666	1.06e-12	Cdkl2, G3bp2
268	M23	chr5	5	qF	110070043	110714343	37	0.352535	0	0.352535	2.433e-15	Gm10416, Plcxd1, Gtpbp6, A830023I12Rik, Chfr, Golga3, Ankle2, Pgam5, Pxmp2
269	M23	chr5	5	qF	111232124	111314204	9	0.604873	0	0.604873	1.74e-11	Ulk1, Hscb, Chek2
271	M23	chr5	5	qF	121027814	121131582	13	0.787634	0	0.787634	1.669e-25	Tpcn1, Iqcd, 1110008J03Rik, Ddx54, Rasal1, Dtx1
272	M23	chr5	5	qF	123236577	123344478	11	1.39592	0	1.39592	1.304e-63	Anapc5, Rnf34, Kdm2b
273	M23	chr5	5	qF	123354661	123596940	26	0.453754	0	0.453754	1.467e-17	Kdm2b, Orai1, Morn3, Tmem120b, Rhof
275	M23	chr5	5	qG1.1	125874080	125936115	7	1.28497	0	1.28497	5.094e-34	Dhx37, Bri3bp
276	M23	chr5	5	qG1.3	130300469	130700471	41	0.826984	0	0.826984	2.995e-83	Cct6a, Snora15, Sumf2, Phkg1, Chchd2, Scand3, 4930579G22Rik, Vkorc1l1, Gusb, Asl, Crcp, Tpst1, Kctd7, Rabgef1, 0610007L01Rik
277	M23	chr5	5	qG2	135415016	135686905	27	0.581034	0	0.581034	2.188e-28	Wbscr27, Cldn4, Cldn3, Wbscr25, Abhd11, 2010001M06Rik, Stx1a, Wbscr22, Dnajc30, Vps37d, Mlxipl, Tbl2, Bcl7b, Baz1b
278	M23	chr5	5	qG2	138042701	138141235	13	1.60852	0	1.60852	2.828e-97	Pcolce, Fbxo24, Lrch4, Sap25, Irs3, Agfg2
279	M23	chr5	5	qG2	138546341	139081347	44	0.307421	0	0.307421	4.816e-14	Zkscan1, Zscan21, Zfp113, Cops6, Mcm7, Ap4m1, Taf6, Cnpy4, Mblac1, BC055004, 0910001L09Rik, BC037034, Gal3st4, Gpc2, Stag3, Zfp157, 1700123K08Rik, Zfp68, A430033K04Rik
280	M23	chr5	5	qG2	139635330	139723622	10	1.05389	0	1.05389	2.19e-34	Heatr2, Unc84a
282	M23	chr5	5	qG2	141082172	141353671	28	0.627569	0	0.627569	8.447e-34	Lfng, Ttyh3, Iqce, AA881470, Amz1, Gna12, Card11
283	M23	chr5	5	qG2	144496662	144722096	17	0.925954	0	0.925954	1.71e-44	Eif2ak1, 4921520G13Rik, Aimp2, Pms2
285	M23	chr6	6	qA1	13585562	13643575	7	0.699923	0	0.699923	6.865e-12	B630005N14Rik
286	M23	chr6	6	qA3.3	30200359	30534427	32	0.303157	0	0.303157	2.042e-10	Ube2h, Zc3hc1, Klhdc10, Tmem209, 1700025E21Rik, Cpa2, Cpa4
287	M23	chr6	6	qB1	34225544	34454018	23	0.472285	0	0.472285	1.175e-16	Akr1b3, Gm6644, Akr1b8, Akr1b10, Akr1b7, Bpgm
288	M23	chr6	6	qB1	38386583	38584989	22	0.494649	0	0.494649	1.2e-17	Ubn2, Fmc1, Luc7l2, Klrg2
290	M23	chr6	6	qB2.3	47512880	47934978	28	0.542964	0	0.542964	4.648e-26	Ezh2, Rn4.5s, Pdia4, Zfp786, Zfp398, Zfp282, Zfp212, Zfp783, AI894139
291	M23	chr6	6	qB2.3	48502537	48650197	17	0.589359	0	0.589359	9.814e-19	Lrrc61, Rarres2, Gm5111, Repin1, Zfp775, AI854703, Gimap8, Gimap9, Gimap4
294	M23	chr6	6	qC1	70689731	72381338	155	0.271546	0	0.271546	2.713e-35	Rpia, Eif2ak3, 1700011F03Rik, Foxi3, Thnsl2, Fabp1, Smyd1, Krcc1, Cd8b1, Cd8a, Rmnd5a, Rnf103, Vps24, Kdm3a, Reep1, Mrpl35, Immt, Ptcd3, Polr1a, St3gal5, Atoh8, Sftpb, Usp39, 0610030E20Rik, Tmem150, Rnf181, Vamp5, Vamp8, Ggcx
295	M23	chr6	6	qC3	82931597	83395998	52	0.519268	0	0.519268	7.037e-43	D6Mm5e, Dok1, Loxl3, Htra2, Aup1, Dqx1, Tlx2, Pcgf1, Lbx2, Ccdc142, Mrpl53, Mogs, Wbp1, Ino80b, Rtkn, Wdr54, 1700003E16Rik, Dctn1, Mthfd2, Mobkl1b, Bola3
297	M23	chr6	6	qD1	86344235	86697888	36	0.39675	0	0.39675	1.761e-18	Pcyox1, Tia1, C87436, Pcbp1, Asprv1, Mxd1, Snrnp27, Gmcl1, Anxa4
298	M23	chr6	6	qE3	112981299	113423565	48	0.578158	0	0.578158	9.037e-49	Thumpd3, Gt(ROSA)26Sor, Setd5, Lhfpl4, Mtmr14, Cpne9, Brpf1, Ogg1, Camk1, Tada3l, Arpc4, Ttll3, Rpusd3, Cidec, Jagn1, Il17re, Il17rc
299	M23	chr6	6	qF2 - qF3	124592833	125194662	64	0.415472	0	0.415472	5.381e-34	Lpcat3, Emg1, Phb2, Ptpn6, Grcc10, Rnu7, Atn1, Eno2, Lrrc23, Spsb2, Tpi1, Usp5, Cdca3, Gnb3, Leprel2, Gpr162, Cd4, Lag3, Ptms, Mlf2, Cops7a, C530028O21Rik, Zfp384, Ing4, Acrbp, Lpar5, Chd4, Nop2, Iffo1, Gapdh, Ncapd2, Mrpl51, Vamp1, Tapbpl, Cd27
303	M23	chr6	6	qG2	142323903	142368319	5	0.861301	0	0.861301	1.02e-12	Recql, Golt1b
304	M23	chr7	7	qA1	3552752	3659662	11	1.11003	0	1.11003	1.616e-41	Oscar, Ndufa3, Tfpt, Prpf31, Cnot3, Leng1, Tmc4, Mboat7, Tsen34, Rps9
305	M23	chr7	7	qA1	4674882	4976931	30	1.03055	0	1.03055	9.774e-95	Tmem224, Suv420h2, Cox6b2, 4930401F20Rik, Il11, Tmem190, 2210411K11Rik, Rpl28, Ube2s, D430041B17Rik, Isoc2b, Isoc2a, Zfp628, Nat14, A430110N23Rik, Sbk2, Zfp579, Fiz1, Zfp524, 6430526N21Rik
306	M23	chr7	7	qA1	4705310	4825141	13	1.52281	0	1.52281	4.61e-11	4930401F20Rik, Il11, Tmem190, 2210411K11Rik, Rpl28, Ube2s, D430041B17Rik, Isoc2b
307	M23	chr7	7	qA1	13467306	13618490	16	1.1336	0	1.1336	4.432e-39	Zfp128, Zscan22, Rps5, 2310014L17Rik, Zfp324, Zfp446, Slc27a5, Zbtb45, Trim28, Chmp2a
308	M23	chr7	7	qA2	16629583	16712046	9	0.91871	0	0.91871	6.179e-14	Zfp541, Napa, Kptn
309	M23	chr7	7	qA3	19675357	20314658	68	0.847873	0	0.847873	3.11e-74	Dmpk, Six5, Fbxo46, Qpctl, Snrpd2, Gipr, Eml2, Gpr4, Opa3, Vasp, C79127, Rtn2, Fosb, Ercc1, Cd3eap, Ppp1r13l, Ercc2, Klc3, Ckm, Mark4, Bloc1s3, Trappc6a, Nkpd1, Lrrc68, Gemin7, Zfp296, Sfrs16, Relb, Clptm1, Apoc2, Apoc4, Apoc1, Apoe, Tomm40, Pvrl2
311	M23	chr7	7	qA3	26007497	26063247	6	1.86042	0	1.86042	2.058e-47	Zfp526, Gsk3a, Erf
313	M23	chr7	7	qA3	27969029	28361263	39	0.878451	0	0.878451	4.705e-48	Snrpa, Itpkc, Adck4, Numbl, Ltbp4, Shkbp1, Spnb4, Blvrb, Sertad3, Sertad1, Prx, Hipk4, Pld3, 2310022A10Rik
314	M23	chr7	7	qA3	29183335	29213130	4	1.66738	0	1.66738	1.098e-25	Paf1, Samd4b
315	M23	chr7	7	qA3	29506048	29595005	9	1.65906	0	1.65906	7.593e-54	Fbxo17, Mrps12, Sars2, Nfkbib, Sirt2, Rinl
316	M23	chr7	7	qB1	31019945	31433496	48	0.98104	0	0.98104	3.738e-78	Wdr62, Clip3, Alkbh6, AI428936, Sdhaf1, Lrfn3, Tyrobp, Hcst, Nfkbid, Aplp1, Kirrel2, Nphs1, Nphs1as, Prodh2, Snx26, BC053749, Hspb6, Lin37, Psenen, U2af1l4, Tmem149, Wbp7, Zbtb32, Upk1a, Cox6b1, Etv2, Rbm42
317	M23	chr7	7	qB1	31019945	31108349	10	1.8061	0	1.8061	1.398e-21	Wdr62, Clip3, Alkbh6, AI428936, Sdhaf1
319	M23	chr7	7	qB4	52042937	53163167	116	0.875818	0	0.875818	9.958e-260	Atf5, Nup62, Il4i1, Tbc1d17, Akt1s1, Pnkp, Ptov1, Med25, Fuz, Ap2a1, Tsks, Cpt1c, Prmt1, Bcl2l12, Irf3, Scaf1, Rras, Prr12, Prrg2, Nosip, Rcn3, Fcgrt, Rps11, Snord35b, Rpl13a, Snord35a, Snord34, Snord33, Snord32a, Flt3l, Aldh16a1, Pih1d1, Slc17a7, Pth2, Ccdc155, Dkkl1, Tead2, Cd37, 1700039E15Rik, Trpm4, Hrc, Ppfia3, Mtag2, Lin7b, Snrnp70, Kcna7, Ntf5, Lhb, Ruvbl2, Gys1, Ftl1, Bax, Dhdh, Nucb1, Tu…
320	M23	chr7	7	qB4	52183033	52265135	10	1.73607	0	1.73607	6.933e-23	Ap2a1, Tsks, Cpt1c, Prmt1, Bcl2l12, Irf3, Scaf1
321	M23	chr7	7	qB4	52936676	53060518	15	1.35988	0	1.35988	3.833e-12	Ntn5, Car11, Dbp, Sphk2, Rpl18, Fam83e, Spaca4, Sult2b1, Gm5897, Lmtk3
322	M23	chr7	7	qC	73803225	73929540	15	0.493781	0	0.493781	1.452e-12	Asb7, Lins2, Lass3
323	M23	chr7	7	qD1	80681415	80752765	5	0.920225	0	0.920225	2.88e-14	Chd2
324	M23	chr7	7	qD3	87381901	87716158	34	0.423294	0	0.423294	9.956e-20	D330012F22Rik, Ttll13, Ngrn, Vps33b, Prc1, Rccd1, Unc45a, Hddc3, Man2a2, Fes, Furin, Blm
325	M23	chr7	7	qE2	106213265	106325843	12	0.493983	0	0.493983	2.101e-10	Uvrag, Dgat2
326	M23	chr7	7	qE3	107656860	107754926	11	0.734819	0	0.734819	2.789e-19	Dnajb13, Chchd8, Mrpl48
328	M23	chr7	7	qF1	117182461	117264581	10	0.809901	0	0.809901	4.248e-21	Ipo7, Zfp143
329	M23	chr7	7	qF1	118191694	118262423	9	0.944354	0	0.944354	2.163e-25	Ctr9, Eif4g2
331	M23	chr7	7	qF1	123592438	123684496	9	0.571377	0	0.571377	4.9e-10	Nucb2
332	M23	chr7	7	qF2	125200914	125392689	18	0.400465	0	0.400465	2.791e-10	Rps15a, Arl6ip1, Smg1, 4930583K01Rik
333	M23	chr7	7	qF2	128079949	128192678	12	0.540522	0	0.540522	4.07e-12	Polr3e, Cdr2, Mettl9
334	M23	chr7	7	qF3	134335755	134729212	39	0.805719	0	0.805719	9.85e-76	Cd2bp2, Tbc1d10b, Mylpf, Sept1, Zfp553, Zfp771, Dctpp1, Sephs2, Itgal, Zfp768, Zfp747, 9130019O22Rik, E430018J23Rik, Zfp764, Zfp688, Zfp689, Prr14, Fbrs, 1700008J07Rik, Phkg2, Gm166
335	M23	chr7	7	qF4	144596191	144618068	3	0.974956	0	0.974956	3.548e-10	9430038I01Rik
336	M23	chr7	7	qF5	148276792	148640164	39	0.409722	0	0.409722	1.043e-20	Sigirr, Ano9, Ptdss2, Rnh1, Hras1, Lrrc56, 1600016N20Rik, Rassf7, Phrf1, Irf7, Mupcdh, Sct, Drd4, Deaf1, Tmem80, Eps8l2, B230206H07Rik, Taldo1, Gm4535, Pddc1, Cend1, Slc25a22, Lrdd, Rplp2
338	M23	chr8	8	qA1.1	4142160	4297584	15	0.660111	0	0.660111	1.663e-18	Evi5l, BC068157, Lrrc8e, Map2k7, Snapc2, Ctxn1, Timm44, Elavl1
341	M23	chr8	8	qA2	23870456	23937263	9	0.804477	0	0.804477	2.269e-16	Plat, Ap3m2
342	M23	chr8	8	qA2	26717138	26929223	25	0.445239	0	0.445239	1.486e-13	Whsc1l1, Ppapdc1b, Ddhd2, Bag4, Lsm1, Star, Ash2l
343	M23	chr8	8	qB2	59941610	60061654	12	0.608891	0	0.608891	4.948e-13	Scrg1, Sap30, Hmgb2, Galnt7
344	M23	chr8	8	qB3.1	67202364	67259766	7	0.760992	0	0.760992	2.321e-12	Sc4mol, Klhl2
345	M23	chr8	8	qB3.3	72158714	75102925	264	0.376996	0	0.376996	1.045e-110	Zfp869, D330038O06Rik, Atp13a1, Gmip, Lpar2, Pbx4, Cilp2, Ndufa13, Tssk6, Gatad2a, 9130404D08Rik, Sf4, Tm6sf2, Hapln4, Ncan, Rfxank, Nr2c2ap, 2310045N01Rik, Mef2b, Tmem161a, Slc25a42, Armc6, Sfrs14, Homer3, Ddx49, Cope, Gdf1, Lass1, Upf1, Comp, Crtc1, Klhl26, Tmem59l, Crlf1, 2810428I15Rik, Uba52, Gm11808, 2810422J05Rik, Fkbp8, Ell, Isyna1, Ssbp4, Lrrc25, Gdf15, Pgpep1, Lsm4, Jund, Pde4c, Rab3a, M…
346	M23	chr8	8	qB3.3	72158714	72355110	17	0.948517	0	0.948517	3.805e-18	Zfp869, D330038O06Rik, Atp13a1, Gmip, Lpar2
347	M23	chr8	8	qB3.3	73196715	73383491	21	1.07699	0	1.07699	5.298e-32	Lsm4, Jund, Pde4c, Rab3a, Mpv17l2, Ifi30, Pik3r2, Il12rb1, Arrdc2, Kcnn1
348	M23	chr8	8	qB3.3	73891011	74013507	12	0.60384	0	0.60384	1.307e-11	Use1, Ocel1, Nr2f6, Ushbp1, 5430437P03Rik, Ankle1, Abhd8, Mrpl34, Dda1, Gtpbp3
349	M23	chr8	8	qC1	77520154	77624527	10	0.820321	0	0.820321	1.351e-21	Hmgxb4, Tom1, Hmox1
351	M23	chr8	8	qC2 - qC3	86113629	86786228	63	1.16491	0	1.16491	8.887e-249	Tecr, Dnajb1, Gipc1, Ptger1, Pkn1, Ddx39, Cd97, Lphn1, Asf1b, Prkaca, Samd1, 1700067K01Rik, 4432412L15Rik, Il27ra, Rln3, Rfx1, Dcaf15, Podnl1, Cc2d1a, 4930432K21Rik, Nanos3, Zswim4, D8Ertd738e, Mri1, Ccdc130
352	M23	chr8	8	qC2 - qC3	86202947	86465905	20	0.528312	0	0.528312	1.271e-25	Pkn1, Ddx39, Cd97, Lphn1
356	M23	chr8	8	qC3	91156122	91287339	14	0.759596	0	0.759596	1.529e-25	Snx20, Nod2, Cyld
357	M23	chr8	8	qC5	93408702	93654918	26	0.406599	0	0.406599	1.861e-14	Chd9, Rbl2, Aktip
359	M23	chr8	8	qC5	97104559	97166458	7	0.939078	0	0.939078	1.195e-12	2310065K24Rik, Rspry1
360	M23	chr8	8	qD3	112085034	112227210	14	0.622482	0	0.622482	9.043e-18	Dhx38, Txnl4b, Hp, Dhodh, Pkd1l3, 2400003C14Rik
362	M23	chr8	8	qE1	119465366	119534493	8	0.677589	0	0.677589	1.305e-12	Cenpn, Atmin, 1700030J22Rik, Gcsh, Pkd1l2
364	M23	chr8	8	qE1	125551124	125625493	9	0.84481	0	0.84481	1.064e-20	Ankrd11, Spg7
366	M23	chr9	9	qA3	20330908	20527974	21	0.564638	0	0.564638	1.701e-21	Zfp846, 5730577I03Rik, Fbxl12, Ubl5, Pin1, Olfm2
367	M23	chr9	9	qA3	20808916	22149371	135	0.65663	0	0.65663	3.454e-171	Mrpl4, Icam1, Icam4, Icam5, Glp1, Fdx1l, Raver1, Tyk2, Cdc37, Pde4a, Keap1, S1pr5, Atg4d, Kri1, Cdkn2d, Ap1m2, Slc44a2, Ilf3, Qtrt1, Dnm2, Tmed1, AB124611, Carm1, Yipf2, 1810026J23Rik, Gm7904, Smarca4, Ldlr, Spc24, Kank2, Dock6, Gm6484, Rab3d, Tmem205, 2510048L02Rik, BC018242, 2310047B19Rik, Epor, Rgl3, Ccdc151, Prkcsh, Elavl3, Zfp653, Ecsit, Cnn1, Elof1, Acp5, Pigyl, Zfp872, 1810064F22Rik, Zfp80…
368	M23	chr9	9	qA3	21006076	21226381	25	1.15804	0	1.15804	2.701e-20	Pde4a, Keap1, S1pr5, Atg4d, Kri1, Cdkn2d, Ap1m2, Slc44a2, Ilf3, Qtrt1
370	M23	chr9	9	qA4	30984794	31091424	12	0.914508	0	0.914508	2.917e-31	Aplp2, Gm7244
371	M23	chr9	9	qA4	37000996	37068897	8	0.690213	0	0.690213	5.098e-13	Tmem218, Slc37a2
373	M23	chr9	9	qA5.1 - qA5.2	43844831	44106807	30	0.536577	0	0.536577	5.735e-27	Thy1, Usp2, Mfrp, C1qtnf5, Rnf26, Mcam, Cbl, Ccdc153, Pdzd3, Nlrx1, Abcg4, Hinfp
374	M23	chr9	9	qA5.2	44118120	44193914	9	1.79423	0	1.79423	9.162e-84	C2cd2l, Dpagt1, H2afx, Hmbs, Vps11, Hyou1
375	M23	chr9	9	qB	56784437	56997922	21	0.658772	0	0.658772	1.438e-28	Imp3, Snupn, Ptpn9, Sin3a, Man2c1, Neil1
376	M23	chr9	9	qB	59467622	59485687	3	0.907199	0	0.907199	7.232e-10	Parp6
379	M23	chr9	9	qE3.3 - qE4	100431078	100523531	9	0.623918	0	0.623918	4.14e-12	Nck1, Tmem22
381	M23	chr9	9	qF1	106728067	106854862	14	0.572608	0	0.572608	2.57e-15	Vprbp, Rbm15b, Manf, Dock3
382	M23	chr9	9	qF1 - qF2	107462867	108548541	110	0.415274	0	0.415274	2.795e-57	Rassf1, Tusc2, Hyal2, Hyal1, Nat6, Hyal3, Ifrd2, BY080835, Sema3b, Gnai2, Slc38a3, Gnat1, Sema3f, Rbm5, Rbm6, Mon1a, Mst1r, 4921517D21Rik, Camkv, Traip, Ube1l, D330022A01Rik, 6230427J02Rik, 1700021K14Rik, Ip6k1, Gmppb, Rnf123, Amigo3, Mst1, Apeh, Bsn, Dag1, Nicn1, Amt, Tcta, Rhoa, Gpx1, Usp4, 1700102P08Rik, Ccdc36, BC048562, Klhdc8b, Ccdc71, Lamb2, Usp19, Qars, Qrich1, Impdh2, Ndufaf3, Dalrd3, Wd…
383	M23	chr9	9	qF2	109775895	109833275	6	0.945905	0	0.945905	1.324e-17	Cdc25a
384	M23	chr9	9	qF4	121574085	121806168	26	0.64944	0	0.64944	5.637e-34	Vipr1, Sec22c, Deb1, Nktr, Kbtbd5, Hhatl, Ccdc13, Higd1a, Gm9790
387	M23	chr10	10	qB4	61997029	62129155	13	0.538326	0	0.538326	6.869e-13	2510003E04Rik, Ddx21, Ddx50, Stox1
388	M23	chr10	10	qC1	75210713	75523409	32	0.979638	0	0.979638	7.214e-91	Cabin1, Ddt, Gstt3, Gstt1, Gstt4, Gstt2, Mif, Derl3, Smarcb1, Mmp11, Chchd10, Vpreb3, Gm5134, Zfp280b, Slc5a4b
390	M23	chr10	10	qC1	79304826	81481292	192	0.776421	0	0.776421	0	Ptbp1, BC005764, Prtn3, Ela2, Cfd, Med16, C030046I01Rik, Kiss1r, Arid3a, Wdr18, Grin3b, ORF61, Cnn2, Abca7, Hmha1, Polr2e, Gpx4, Sbno2, Stk11, Dos, Atp5d, Midn, Cirbp, 1600002K03Rik, Efna2, Mum1, Ndufs7, Gamt, Dazap1, Rps15, Apc2, 2310011J03Rik, Pcsk4, Reep6, Adamtsl5, Plk5, Mex3d, Mbd3, Uqcr, Tcfe2a, Onecut3, Atp8b3, Rexo1, Klf16, Fam108a, Adat3, Scamp4, Csnk1g2, Btbd2, Mknk2, Mobkl2a, 9030607L1…
391	M23	chr10	10	qC1	79448762	79688301	26	1.38145	0	1.38145	1.663e-29	Cnn2, Abca7, Hmha1, Polr2e, Gpx4, Sbno2, Stk11, Dos, Atp5d, Midn, Cirbp, 1600002K03Rik, Efna2
393	M23	chr10	10	qC1	84566714	84654929	11	0.867971	0	0.867971	3.737e-26	AI597468, Mterfd3, Cry1
394	M23	chr10	10	qC1	86041367	86246908	14	0.604833	0	0.604833	7.035e-17	1810014B01Rik, Hsp90b1, BC030307, Nt5dc3
396	M23	chr10	10	qD3	127511153	128313675	78	0.986931	0	0.986931	2.501e-221	Ptges3, Atp5b, Baz2a, Rbms2, Gls2, Spryd4, Mip, Timeless, Apon, Apof, Stat2, Il23a, Usp52, Cnpy2, Cs, Coq10a, Ankrd52, Slc39a5, Obfc2b, Rnf41, Smarcc2, Myl6, Myl6b, Esyt1, Zc3h10, Rpl41, Pa2g4, Erbb3, Rps26, Ikzf4, Suox, Rab5b, Cdk2, Si, Dgka, Wibg, Mmp19, 1110012D08Rik, Dnajc14, Ormdl2, Sarnp
399	M23	chr11	11	qA1	4057583	4148688	11	0.649239	0	0.649239	1.877e-15	Ccdc157, Sf3a1, Tbc1d10a, Gatsl3, Osm
401	M23	chr11	11	qA1	6194658	6426112	26	0.683904	0	0.683904	1.852e-37	Ogdh, Zmiz2, Ppia, Purb, Myo1g
403	M23	chr11	11	qA3.2	23012594	23194141	12	0.60183	0	0.60183	1.344e-14	Xpo1
404	M23	chr11	11	qA4	32342053	32547392	23	0.438277	0	0.438277	8.267e-15	Ubtd2, Efcab9, Stk10, Fbxw11
405	M23	chr11	11	qA5	40519273	40577298	6	1.20314	0	1.20314	3.794e-27	Hmmr, Nudcd2, Ccng1
407	M23	chr11	11	qB1.3	50048571	50176586	14	0.732166	0	0.732166	7.242e-24	Mgat4b, Ltc4s, Maml1, Canx
408	M23	chr11	11	qB1.3	54616283	54870653	27	0.488558	0	0.488558	9.217e-21	Lyrm7, Hint1, Gpx3, Tnip1, Anxa6, Ccdc69
410	M23	chr11	11	qB1.3 - qB2	58633072	61376495	247	0.295877	0	0.295877	1.755e-64	Olfr312, Olfr311, 2810021J22Rik, Zfp39, Butr1, Hist3h2ba, Hist3h2bb, Hist3h2a, Trim17, Trim11, A230051G13Rik, Gjc2, Guk1, Mrpl55, 2310033P09Rik, Arf1, Wnt3a, Wnt9a, Gm249, Snap47, Jmjd4, Zfp867, Zkscan17, Nlrp3, Olfr222, Olfr223, Olfr225, Mprip, Pld6, Flcn, Cops3, Nt5m, Med9, Rasd1, Pemt, Rai1, Srebf1, Tom1l2, Lrrc48, Atpaf2, 4933439F18Rik, Drg2, Myo15, Alkbh5, Llgl1, Flii, Smcr7, Top3a, Smcr8, S…
411	M23	chr11	11	qB1.3	58667480	58772598	11	1.12551	0	1.12551	4.633e-24	2810021J22Rik, Zfp39, Butr1, Hist3h2ba, Hist3h2bb, Hist3h2a
412	M23	chr11	11	qB2	60121835	60235296	13	0.889882	0	0.889882	2.928e-15	Tom1l2, Lrrc48, Atpaf2, 4933439F18Rik
413	M23	chr11	11	qB2	60989454	61062117	10	1.04742	0	1.04742	9.92e-18	Aldh3a1, Aldh3a2
414	M23	chr11	11	qB3	63710411	63768021	7	0.749216	0	0.749216	1.801e-12	Hs3st3b1
416	M23	chr11	11	qB3	68766792	68909840	15	1.65225	0	1.65225	5.456e-118	Arhgef15, Slc25a35, Rangrf, Gm4535, Pfas, 1500010J02Rik, Aurkb, 2310047M10Rik, Tmem107, Vamp2
419	M23	chr11	11	qB4	70796008	70850932	7	1.38962	0	1.38962	5.316e-27	C1qbp, Dhx33, Derl2, Mis12, 6330403K07Rik
420	M23	chr11	11	qB4	72781596	73035193	28	0.488619	0	0.488619	1.821e-21	Atp2a3, P2rx1, Camkk1, 1200014J11Rik, Itgae, Gsg2, P2rx5, Tmem93, Tax1bp3, Ctns, Shpk
421	M23	chr11	11	qB5	75159849	75371093	21	1.16433	0	1.16433	6.925e-85	Rpa1, Smyd4, Serpinf1, Serpinf2, Wdr81, Tlcd2, Prpf8, Rilp, Scarf1, Slc43a2
422	M23	chr11	11	qB5	78298988	78523376	25	0.617886	0	0.617886	7.927e-30	Sarm1, Vtn, Sebox, Tmem199, Poldip2, Tnfaip1, Ift20, Tmem97, Nlk
423	M23	chr11	11	qB5	79773834	79823293	7	0.548992	0	0.548992	2.725e-10	Utp6, Suz12
424	M23	chr11	11	qC	82923607	83141110	17	0.568095	0	0.568095	5.959e-18	Slfn1, Slfn4, Slfn3, AI662270, Pex12, Ap2b1
426	M23	chr11	11	qC	86744860	87555571	84	0.461455	0	0.461455	8.976e-54	Ypel2, Gdpd1, 1200011M11Rik, Prr11, Fam33a, Trim37, Ppm1e, Rad51c, Tex14, Sept4, Mtmr4, Hsf5, Rnf43, Supt4h1, Gm3258
427	M23	chr11	11	qC	86810572	86933115	14	1.0392	0	1.0392	1.466e-15	Gdpd1, 1200011M11Rik, Prr11, Fam33a
428	M23	chr11	11	qD	94058422	94131827	8	0.696125	0	0.696125	3.264e-13	Tob1, Wfikkn2
429	M23	chr11	11	qD	95154099	95250832	12	1.06392	0	1.06392	1.328e-41	Myst2, Fam117a, Slc35b1
431	M23	chr11	11	qD	96636809	97083470	44	1.13547	0	1.13547	5.249e-166	Snx11, Cbx1, Nfe2l1, Copz2, Cdk5rap3, Atad4, Pnpo, D030028A08Rik, Sp2, Sp6, Scrn2, Lrrc46, Mrpl10, Osbpl7, Tbx21, Tbkbp1, Kpnb1, Npepps
432	M23	chr11	11	qD	96649609	96841593	19	1.66909	0	1.66909	1.462e-17	Cbx1, Nfe2l1, Copz2, Cdk5rap3, Atad4, Pnpo, D030028A08Rik, Sp2
436	M23	chr11	11	qD	100779807	101033294	28	0.601035	0	0.601035	1.716e-31	Stat3, Ptrf, Atp6v0a1, Naglu, Hsd17b1, Coasy, Mlx, Psmc3ip, Fam134c, Tubg1, Tubg2, Plekhh3
437	M23	chr11	11	qD	101284408	101465864	21	0.451122	0	0.451122	2.2e-14	1700113i22rik, Rundc1, Rpl27, Gm6199, Ifi35, Vat1, Rnd2, Brca1, Nbr1, Tmem106a
438	M23	chr11	11	qE1	102782644	103139856	35	0.817628	0	0.817628	5.126e-70	Kif18b, C1ql1, Dcakd, Nmt1, Plcd3, Acbd4, Hexim1, Hexim2, Fmnl1, 4933400C05Rik, Map3k14
439	M23	chr11	11	qE1	105897499	106081504	20	1.22073	0	1.22073	1.019e-87	Dcaf7, Ccdc44, Map3k3, Limd2, Strada, Ccdc47, Ddx42
440	M23	chr11	11	qE2	114992045	116368193	144	0.513592	0	0.513592	2.974e-112	Rab37, Cd300lf, Slc9a3r1, Nat9, Tmem104, Grin2c, Fdxr, Fads6, Otop2, Ush1g, Otop3, C630004H02Rik, Cdr2l, Ict1, Atp5h, Kctd2, 4933422H20Rik, Slc16a5, Armc7, Nt5c, Hn1, Sumo2, Nup85, Gga3, Mrps7, Mif4gd, Slc25a19, Grb2, 2310067B10Rik, Caskin2, Tsen54, Llgl2, Recql5, 2210020M01Rik, 1110017F19Rik, Sap30bp, Itgb4, Galk1, H3f3b, Unk, Unc13d, Wbp2, Trim47, Trim65, Mrpl38, Fbf1, Acox1, 2310004N24Rik, Cdk…
441	M23	chr11	11	qE2	115032358	115050127	3	1.46518	0	1.46518	8.95e-10	Slc9a3r1, Nat9, Tmem104
442	M23	chr11	11	qE2	116241080	116292548	8	1.15468	0	1.15468	1.959e-11	Rnf157
443	M23	chr11	11	qE2	118291801	118369612	9	0.584108	0	0.584108	7.934e-11	C1qtnf1, Engase, D11Bwg0517e
444	M23	chr11	11	qE2	118886773	118966536	9	0.984185	0	0.984185	2.063e-27	Cbx2, Cbx8, Cbx4
445	M23	chr11	11	qE2	119799402	120635173	83	1.09809	0	1.09809	5.389e-292	Baiap2, Aatk, Azi1, 2410002I01Rik, 1810043H04Rik, Slc38a10, Bahcc1, Actg1, Fscn2, 2310003H01Rik, Nploc4, Tspan10, Pde6g, 1810049H13Rik, Ccdc137, Arl16, Hgs, Mrpl12, Slc25a10, Gcgr, BC003940, Dysfip1, P4hb, Arhgdia, Thoc4, Anapc11, Npb, Pcyt2, Sirt7, Mafg, Pycr1, Myadml2, Notum, Aspscr1, Stra13, Lrrc45, Rac3, Dcxr, Cbr2
446	M23	chr11	11	qE2	119799402	119936549	16	0.681308	0	0.681308	5.823e-10	Baiap2, Aatk, Azi1
447	M23	chr11	11	qE2	120085078	120204360	11	1.61934	0	1.61934	1.389e-10	Bahcc1
450	M23	chr12	12	qA1.3	21335507	25381974	40	0.49145	0	0.49145	3.626e-30	Adam17, Ywhaq, Taf1b, Grhl1, Klf11, Cys1
451	M23	chr12	12	qB1	40735723	41221744	44	0.32414	0	0.32414	2.06e-15	Arl4a, Scin, Gm889, Ifrd1, Zfp277, Dock4
452	M23	chr12	12	qC1	60126848	60178960	7	0.751938	0	0.751938	1.88e-13	Sip1, Trappc6b, Pnn
453	M23	chr12	12	qC3	72046117	72152544	13	0.858863	0	0.858863	5.865e-30	Actr10, Psma3, Arid4a
454	M23	chr12	12	qC3	74957038	75083433	12	0.520715	0	0.520715	2.273e-11	Hif1a, Snapc1
455	M23	chr12	12	qC3	76677031	76813649	17	1.23277	0	1.23277	1.257e-76	Ppp2r5e, Wdr89
456	M23	chr12	12	qC3	77340196	77498327	17	0.576145	0	0.576145	2.068e-18	Tex21, Mthfd1, Akap5, Zbtb25, Zbtb1
457	M23	chr12	12	qC3	79820057	79945050	14	0.480617	0	0.480617	2.602e-11	Fam71d, Mpp5, Atp6v1d
458	M23	chr12	12	qD1	85663406	85839161	16	0.634979	0	0.634979	8.817e-21	Zfp410, Fam161b, Coq6, Entpd5, 2900006K08Rik, Rnf113a2, Aldh6a1, Lin52
459	M23	chr12	12	qD2	87109694	87213302	10	0.674711	0	0.674711	3.324e-15	Mfsd7c, 0610007P14Rik, Ttll5
460	M23	chr12	12	qD2	88679622	88794219	13	0.574863	0	0.574863	1.891e-14	Sptlc2, Alkbh1, Nrp, 1810035L17Rik, Snw1
462	M23	chr12	12	qE	101415698	101451885	5	0.822929	0	0.822929	9.216e-12	Calm1
468	M23	chr12	12	qF1	112759383	113145492	36	0.635016	0	0.635016	2.536e-44	Eif5, Mark3, Ckb, Trmt61a, Bag5, 2810002N01Rik, Klc1, Xrcc3, Zfyve21, Ppp1r13b
469	M23	chr12	12	qF1	114199229	114421426	22	0.621425	0	0.621425	9.18e-27	Brf1, Btbd6, Pacs2, Tex22, Mta1, Crip2, Crip1, 4930427A07Rik
470	M23	chr13	13	qA1	5830955	5935750	8	0.679761	0	0.679761	1.111e-12	Klf6
471	M23	chr13	13	qA1	8871211	9121585	19	0.483899	0	0.483899	6.699e-15	Idi1, Idi2, Gtpbp4, Larp5
473	M23	chr13	13	qA3.1	21813250	21921804	11	2.05424	0	2.05424	4.452e-127	Hist1h2bm, Hist1h4j, Hist1h4k, Hist1h2ak, Hist1h2bn, Hist1h1b, Hist1h3i, Hist1h2an, Hist1h2bp, LOC665622, OTTMUSG00000013203, Hist1h2ao, Hist1h4m
474	M23	chr13	13	qA3.1	22001321	22177580	18	0.447332	0	0.447332	2.118e-12	Zfp184, Pom121l2, Prss16, Hist1h2ah, Hist1h2bk, Hist1h4i, Hist1h2ag, Hist1h2bj
477	M23	chr13	13	qA3.1	23648864	23725304	10	2.12452	0	2.12452	7.568e-11	Hist1h1d, Hist1h3e, Hist1h2ae, Hist1h2bg, Hist1h2bf, Hist1h2ad, Hist1h3d, Hist1h4d, Hist1h2be, Hist1h1e
478	M23	chr13	13	qA5	48596353	48710553	13	0.651418	0	0.651418	4.864e-18	Zfp169, Ptpdc1
479	M23	chr13	13	qB1	55461278	55635040	19	0.802631	0	0.802631	1.088e-37	Lman2, Rgs14, Slc34a1, Pfn3, F12, Grk6, Prr7, Dbn1, Pdlim7, Dok3, Ddx41
480	M23	chr13	13	qB3	63537169	64388163	65	0.262048	0	0.262048	6.073e-15	Ptch1, 0610007P08Rik, Hsd17b3, Slc35d2, Zfp367, Habp4, Cdc14b
481	M23	chr13	13	qD1	100068624	100194789	15	0.486137	0	0.486137	3.121e-12	Ptcd2, Mrps27, Mtap1b
482	M23	chr14	14	qA3	21678192	21906281	25	0.529385	0	0.529385	2.087e-22	Vcl, Ap3m1, Adk
483	M23	chr14	14	qC1	45789074	45977510	22	0.618687	0	0.618687	1.517e-26	Txndc16, Gpr137c, Ero1l, Psmc6, Styx
484	M23	chr14	14	qC1	47360060	47465025	12	0.728865	0	0.728865	1.475e-20	Cdkn3, Cnih, Gmfb, Cgrrf1
485	M23	chr14	14	qC1	51491923	51650719	18	0.414076	0	0.414076	1.385e-10	Osgep, Apex1, Tmem55b, Pnp1, Pnp2, Rnase10
486	M23	chr14	14	qC2	52650660	52891234	24	0.475702	0	0.475702	8.669e-18	Olfr1514, Olfr221, Hnrnpc, Rpgrip1, Supt16h, Chd8, Rab2b
491	M23	chr14	14	qC3	56150381	56228251	10	0.893538	0	0.893538	2.873e-25	Pck2, Dcaf11, Fitm1, Psme1, Fam158a, Psme2, Rnf31, Irf9
492	M23	chr14	14	qC3	57183021	57520968	35	0.527435	0	0.527435	2.181e-30	Cenpj, Parp4, Mphosph8, Pspc1, Zmym5, Zmym2
493	M23	chr14	14	qD1	63691413	63826197	15	0.52235	0	0.52235	7.52e-14	Ctsb, Fdft1, Neil2, Gata4
494	M23	chr14	14	qD1	68103247	68386202	19	0.443565	0	0.443565	8.371e-13	Cdca2, Kctd9, Gnrh1, Dock5
495	M23	chr14	14	qE4	119330641	119406329	9	0.794597	0	0.794597	1.584e-18	Dnajc3, Uggt2
496	M23	chr14	14	qE4	120644586	120945177	29	0.342638	0	0.342638	8.12e-12	Mbnl2, Rap2a
497	M23	chr15	15	qA1	11315563	11394029	6	0.671542	0	0.671542	9.634e-10	Tars
499	M23	chr15	15	qD3	72906373	72976751	8	0.732917	0	0.732917	1.875e-14	Chrac1, Eif2c2
500	M23	chr15	15	qD3	76134040	76604261	51	0.451516	0	0.451516	3.295e-32	Oplah, LOC100302626, Exosc4, Gpaa1, Cyc1, Sharpin, Maf1, Brp16, Tssk5, Heatr7a, Bop1, Scx, Hsf1, Dgat1, Scrt1, Fbxl6, Gpr172b, Adck5, Cpsf1, Slc39a4, Vps28, Nfkbil2, Cyhr1, Kifc2, Foxh1, Ppp1r16a, Gpt, Mfsd3, Recql4, Lrrc14, Lrrc24, C030006K11Rik, D15Wsu169e
501	M23	chr15	15	qE1	77645924	77775814	12	0.500562	0	0.500562	1.228e-10	Myh9, Txn2, Foxred2
502	M23	chr15	15	qE1	78743259	78923034	20	1.50745	0	1.50745	1.029e-133	Pdxp, Lgals1, Nol12, Triobp, H1f0, Gcat, Galr3, Ankrd54, Eif3l
503	M23	chr15	15	qE1	79515033	79588749	8	1.17606	0	1.17606	2.904e-34	Josd1, Gtpbp1, Unc84b
504	M23	chr15	15	qE1	80971938	82190009	117	0.512592	0	0.512592	2.264e-91	Mkl1, 4930483J18Rik, Mchr1, Slc25a17, St13, Xpnpep3, Dnajb7, Rbx1, Ep300, L3mbtl2, Rangap1, Zc3h7b, Tef, Tob2, Phf5a, Aco2, Polr3h, Csdc2, Pmm1, 1700029P11Rik, Pppde2, Xrcc6, Nhp2l1, Ccdc134, Srebf2, Tnfrsf13c, Cenpm, Sept3, Wbp2nl, Naga, Fam109b, 1500032L24Rik, Ndufa6
505	M23	chr15	15	qE1	81958797	82170027	20	0.980861	0	0.980861	1.29e-14	Ccdc134, Srebf2, Tnfrsf13c, Cenpm, Sept3, Wbp2nl, Naga
506	M23	chr15	15	qE3	88578704	88700383	14	0.670929	0	0.670929	2.412e-20	Zbed4, Alg12, Creld2, Pim3
507	M23	chr15	15	qF1	98333856	99302697	94	0.402561	0	0.402561	2.082e-46	2310037I24Rik, Ccnt1, Adcy6, Cacnb3, Ddx23, Rnd1, Ccdc65, Fkbp11, Arf3, 5830427D03Rik, Wnt10b, Wnt1, Ddn, Prkag1, Rhebl1, Dhh, Lmbr1l, Tuba1b, Tuba1a, Tuba1c, Prph, Troap, C1ql4, Dnajc22, Spats2, Kcnh3, Mcrs1, Fam186b, Prpf40b, Fmnl3, Tmbim6, C230021P08Rik, Bcdin3d
511	M23	chr15	15	qF3	102185293	102452714	28	1.04113	0	1.04113	3.278e-90	Sp7, Sp1, Amhr2, Prr13, Pcbp2, Map3k12, Tarbp2, Npff, Atf7
512	M23	chr15	15	qF3	103041789	103136644	10	1.23755	0	1.23755	4.426e-46	Cbx5, Hnrnpa1, Gm10052, Gm5643, Nfe2, Copz1
513	M23	chr16	16	qA1	4915472	5055147	15	0.812686	0	0.812686	6.942e-31	Mgrn1, Nudt16l1, Anks3, Sept12, Rogdi, 3930401K13Rik, Ubn1
515	M23	chr16	16	qA1	11050440	11226723	20	0.458692	0	0.458692	3.438e-14	Snn, Txndc11, Zc3h7a, Rsl1d1, Gspt1
518	M23	chr16	16	qA3	18790688	18873617	9	0.812353	0	0.812353	2.794e-19	Cdc45l, Ufd1l, 2510002D24Rik, Mrpl40
519	M23	chr16	16	qB1	22371811	22943160	52	0.378201	0	0.378201	1.138e-23	Etv5, Dgkg, Crygs, Tbccd1, Dnajb11, Ahsg, Fetub
522	M23	chr16	16	qC3.3	91590666	91710817	14	1.25845	0	1.25845	1.372e-66	Tmem50b, Dnajc28, Gart, Son, Donson, Cryzl1
523	M23	chr16	16	qC4	96260776	96341157	10	0.670648	0	0.670648	4.815e-15	Brwd1
524	M23	chr17	17	qA1	13056204	13200129	16	0.788724	0	0.788724	5.079e-31	Mas1, Mrgprh, Pnldc1, Mrpl18, Tcp1, Acat3, Acat2, Wtap
525	M23	chr17	17	qA3.3	24299219	25229050	97	0.805873	0	0.805873	9.536e-185	Amdhd2, Atp6v0c, Tbc1d24, Ntn3, 1600002H07Rik, Ccnf, Abca17, Abca3, Rnps1, Dci, Dnase1l2, E4f1, Pgp, Mlst8, 9930021D14Rik, Caskin1, Traf7, Rab26, Pkd1, Tsc2, Nthl1, Slc9a3r2, Npw, Zfp598, Syngr3, Gfer, Noxo1, Tbl3, Rnf151, Snhg9, Rps2, Snora64, Ndufb10, Rpl3l, Sepx1, Hs3st6, 4930528F23Rik, Fahd1, Hagh, Igfals, Nubp2, Spsb3, Eme2, Mrps34, Nme3, Mapk8ip3, Hn1l, Cramp1l, Ift140, Tmem204
526	M23	chr17	17	qA3.3	24591547	24666064	8	1.46485	0	1.46485	5.806e-12	E4f1, Pgp, Mlst8, 9930021D14Rik, Caskin1, Traf7, Rab26
528	M23	chr17	17	qA3.3	24999351	25149304	19	1.7322	0	1.7322	1.595e-49	Hagh, Igfals, Nubp2, Spsb3, Eme2, Mrps34, Nme3, Mapk8ip3, Hn1l, Cramp1l
529	M23	chr17	17	qA3.3	25857341	26079251	24	0.719588	0	0.719588	3.096e-38	Chtf18, Rpusd1, Mslnl, Msln, Narfl, Haghl, Fam173a, Metrn, Wdr24, Jmjd8, Stub1, Rhbdl1, Rhot2, Wdr90, 9530058B02Rik, 0610011F06Rik, Wfikkn1, Rab40c, Gm10012, Pigq, F430201B04Rik
530	M23	chr17	17	qA3.3	26680821	27153971	48	0.471152	0	0.471152	4.548e-33	Ergic1, Atp6v0e, A930001N09Rik, Bnip1, Nkx2-5, Kifc1, Phf1, Cuta, Zbtb9
531	M23	chr17	17	qA3.3	27067800	27128740	7	1.17853	0	1.17853	4.163e-12	Kifc1, Phf1, Cuta, Zbtb9
532	M23	chr17	17	qA3.3	29623271	29715140	13	0.611765	0	0.611765	3.986e-16	Pim1, 4933413N12Rik, Tbc1d22b
535	M23	chr17	17	qB1	33135013	33225520	10	1.13878	0	1.13878	1.764e-14	C920016K16Rik, Zfp763, 4921501E09Rik
537	M23	chr17	17	qB1	34744070	34780986	5	1.80912	0	1.80912	1.193e-27	Agpat1, Egfl8, Ppt2, Prrt1
539	M23	chr17	17	qB1	35977610	36052013	10	1.26019	0	1.26019	1.348e-19	Mdc1, Nrm, 2310014H01Rik, Dhx16, 2310061I04Rik, 2610110G12Rik, Mrps18b
540	M23	chr17	17	qB3	44209493	44261201	6	0.748921	0	0.748921	1.062e-11	Enpp5, Enpp4
541	M23	chr17	17	qC	46687464	47051542	38	0.783581	0	0.783581	5.819e-70	Srf, Ptk7, Klc4, Mrpl2, Cul7, BC011248, Klhdc3, Mea1, Ppp2r5d, Pex6, Gnmt, Cnpy3, Ptcra, 2310039H08Rik, Rpl7l1, BC032203, Tbcc, Prph2
546	M23	chr17	17	qD	57084694	57194349	13	1.39576	0	1.39576	5.843e-15	Acer1, Clpp, Alkbh7, Pspn, Gtf2f1, Khsrp, Slc25a41, Slc25a23
547	M23	chr17	17	qE4	85260908	85435450	15	0.64735	0	0.64735	2.025e-19	1110020A21Rik, Ppm1b, Slc3a1
549	M23	chr17	17	qE4	87992703	88544090	43	0.327822	0	0.327822	2.379e-15	Epcam, Msh2, Kcnk12, Msh6, Fbxo11
551	M23	chr18	18	qB1	34796474	35107434	33	0.935444	0	0.935444	4.528e-86	Cdc23, Gfra3, Cdc25c, Fam53c, Kdm3b, Reep2, Egr1, Etf1, Hspa9
552	M23	chr18	18	qB2	36615954	36975321	37	0.423877	0	0.423877	2.339e-21	Hbegf, Slc4a9, Ankhd1, Eif4ebp3, Sra1, Apbb3, Slc35a4, E230025N22Rik, Cd14, Tmco6, Ndufa2, Ik, Wdr55, Dnd1, Hars, Hars2, Zmat2, Vaultrc5
554	M23	chr18	18	qB3	42363672	42751398	36	0.426264	0	0.426264	4.802e-21	Lars, Rbm27, Pou4f3, Tcerg1, Gpr151
555	M23	chr18	18	qE4	84790105	85056799	20	0.411935	0	0.411935	8.742e-12	Cndp1, Cndp2, B230399E16Rik, Cyb5
557	M23	chr19	19	qA	3756960	4206236	49	0.841796	0	0.841796	4.867e-22	Suv420h1, Chka, Tcirg1, Ndufs8, Aldh3b1, Unc93b1, Acy3, Tbx10, Nudt8, Doc2g, Ndufv1, Gstp1, Gstp2, BC021614, Cabp2, Cdk2ap2, Pitpnm1, Aip, Tmem134, Cabp4, Gpr152, Coro1b, Ptprcap, Rps6kb2, Tbc1d10c, Ppp1ca, Rad9
558	M23	chr19	19	qA	4766119	4911304	15	1.43763	0	1.43763	4.378e-43	Rbm4, Rbm14, Ccs, Ccdc87, Ctsf, Actn3, Zdhhc24, Bbs1, Dpp3
560	M23	chr19	19	qA	6335953	6412025	9	1.06334	0	1.06334	3.283e-11	Men1, Map4k2, Sf1, Pygm, Rasgrp2
561	M23	chr19	19	qA	7042155	7109861	9	1.75409	0	1.75409	1.156e-44	Plcb3, Ppp1r14b, Fkbp2, Vegfb, Dnajc4, Nudt22, Trpt1, Fermt3, Stip1
562	M23	chr19	19	qA	8807896	9020081	24	1.30163	0	1.30163	2.766e-120	Wdr74, Stx5a, Nxf1, Tmem223, Tmem179b, Gm2518, Taf6l, Polr2g, Zbtb3, Ttc9c, Hnrnpul2, Gng3, Bscl2, Lrrn4cl, Ubxn1, AI462493, 5730408K05Rik, 1810009A15Rik, Ints5, Ganab, B3gat3, Rom1, Eml3, Mta2
564	M23	chr19	19	qA	12793239	12904231	11	0.576141	0	0.576141	1.513e-12	Keg1, Cntf, Zfp91-Cntf, Zfp91, Lpxn
565	M23	chr19	19	qA	14633402	14688105	6	0.811321	0	0.811321	1.991e-13	Tle4
566	M23	chr19	19	qB	21699493	21817157	10	0.652552	0	0.652552	2.444e-14	1110059E24Rik, Fam108b
567	M23	chr19	19	qC1	29066264	29526925	42	0.405943	0	0.405943	3.703e-22	Cdc37l1, Gm10136, Ak3, Rcl1, Jak2, Insl6, Rln1, 5033414D02Rik, Cd274, Pdcd1lg2
568	M23	chr19	19	qC1	34582338	34628345	6	0.693968	0	0.693968	2.737e-10	Lipa, Ifit2
569	M23	chr19	19	qC3	40584551	40922464	35	0.540193	0	0.540193	8.856e-32	Sorbs1, Aldh18a1, Tctn3, Entpd1, Ccnj
570	M23	chr19	19	qC3	41881924	42220697	36	0.864235	0	0.864235	2.7e-80	Frat1, Frat2, Rrp12, Pgam1, Exosc1, Zdhhc16, Mms19, Ubtd1, Ankrd2, Dhdpsl, 4933411K16Rik, Morn4, Pi4k2a, Avpi1
571	M23	chr19	19	qC3	43548618	43758890	19	0.796157	0	0.796157	4.071e-37	Cnnm1, Got1, Nkx2-3, Slc25a28
572	M23	chr19	19	qC3	44289208	44471807	17	0.694466	0	0.694466	6.77e-26	Scd3, Scd2, Scd4, Scd1
574	M23	chr19	19	qC3	46265222	46419727	20	0.273173	0	0.273173	3.436e-11	Gbf1, Nfkb2, Psd, Fbxl15, Cuedc2
577	M23	chr19	19	qD2	53927153	54009843	8	0.617648	0	0.617648	9.017e-11	Pdcd4, 2310002J21Rik
578	M23	chrX	X	qA1.1	7099553	7819962	74	0.586091	0	0.586091	5.01e-76	Ppp1r3f, Foxp3, Ccdc22, Cacna1f, Syp, Prickle3, Plp2, Magix, Gpkow, Wdr45, Praf2, Ccdc120, Tcfe3, Gripap1, Kcnd1, Otud5, Pim2, Slc35a2, Pqbp1, Timm17b, Pcsk1n, Eras, Hdac6, Gata1, Glod5, Suv39h1, Was, EG627782, Wdr13, Rbm3, Tbc1d25, Ebp, Porcn, Ftsj1
579	M23	chrX	X	qA1.3	20244096	20565345	32	0.538994	0	0.538994	7.095e-29	Uba1, Pctk1, Usp11, Araf, Syn1, Timp1, Cfp, Elk1, Uxt, A230072C01Rik
580	M23	chrX	X	qA4	45479538	45634154	18	0.70244	0	0.70244	6.845e-28	Xpnpep2, Sash3, Zdhhc9, Utp14a
581	M23	chrX	X	qD	98543000	98718279	19	0.684113	0	0.684113	6.373e-28	Gjb1, Zmym3, Nono, Itgb1bp2
582	M23	chrX	X	qD	103152099	103468529	35	0.296138	0	0.296138	8e-11	Magt1, Cox7b, Atp7a, Tlr13, Pgk1, Taf9b, Fnd3c2
583	M23	chrX	X	qF3	148673200	148808852	14	0.504401	0	0.504401	2.781e-12	Kdm5c, Tspyl2, Gpr173
27	M25	chr1	1	qD	95194949	95492549	35	0.347178	0	0.347178	5.732e-19	Mterfd2, Pask, Ppp1r7, Ano7, Hdlbp, Sept2, Farp2
28	M25	chr1	1	qE4	135961313	135998646	5	0.752028	0	0.752028	2.309e-13	Btg2
29	M25	chr2	2	qA3	24786220	25512737	69	0.374732	0	0.374732	3.478e-41	Arrdc1, Zmynd19, Wdr85, Mrpl41, Pnpla7, Nelf, Entpd8, Noxa1, Nrarp, A830007P12Rik, Cobra1, 4933433C11Rik, Fam166a, Tubb2c, Slc34a3, Gm757, 2310002J15Rik, Rnf208, Ndor1, C730025P13Rik, C430004E15Rik, Ssna1, Anapc2, Lrrc26, Grin1, AA543186, Man1b1, Dpp7, Uap1l1, 2010317E24Rik, Entpd2, Npdc1, Fut7, Abca2, Clic3, BC029214, Ptgds, Lcn12, C8g, Fbxw5, Traf2, Edf1, Mamdc4, Phpt1, Gm996, B230208H17Rik, 49…
31	M25	chr2	2	qE5	118651509	118751803	11	0.519973	0	0.519973	6.854e-12	D2Ertd750e, Ivd, Bahd1
33	M25	chr2	2	qE5	121103503	121273261	19	0.460723	0	0.460723	2.732e-18	Mtap1a, Hisppd2a, Ckmt1, Strc, Catsper2, Pdia3, Ell3
34	M25	chr2	2	qF1	131041518	131086201	5	0.82118	0	0.82118	1.132e-13	Mavs
35	M25	chr2	2	qH1	154387568	154442189	6	0.932707	0	0.932707	6.526e-21	E2f1, Pxmp4, Zfp341
36	M25	chr2	2	qH3	164543040	164701609	17	0.473466	0	0.473466	1.433e-21	Gm14316, Wfdc3, Dnttip1, Ube2c, Tnnc2, Snx21, Acot8, Zswim3, Zswim1, 1700020C07Rik, Neurl2, Ctsa, Pltp
39	M25	chr3	3	qF1	89199720	89234878	5	0.811406	0	0.811406	2.902e-15	Lenep, Flad1, Cks1b, Shc1, Pygo2
41	M25	chr3	3	qF2.1	94690236	96419630	174	0.266702	0	0.266702	4.51e-52	Psmb4, Selenbp1, Rfx5, Pi4kb, Zfp687, Psmd4, Pip5k1a, Vps72, Tmod4, Scnm1, Lysmd1, Tnfaip8l2, Sema6c, Gabpb2, Mllt11, Cdc42se1, Gm128, Bnipl, Prune, Fam63a, Anxa9, Lass2, Setdb1, 4930558C23Rik, Arnt, Ctsk, Ctss, Hormad1, Golph3l, Ensa, Mcl1, Adamtsl4, Ecm1, Tars2, Rprd2, Prpf3, Mrps21, Gm129, BC028528, Aph1a, Car14, Anp32e, Plekho1, Vps45, Otud7b, Mtmr11, Sf3b4, Sv2a, Bola1, Hist2h2ab, Hist2h2ac,…
42	M25	chr3	3	qF2.1	94759757	94844573	11	0.730184	0	0.730184	1.872e-11	Rfx5, Pi4kb, Zfp687, Psmd4
44	M25	chr3	3	qF2.1	96012726	96069190	6	0.861104	0	0.861104	1.88e-10	Hist2h2ab, Hist2h2ac, Hist2h2be, Hist2h3c2, Hist2h3c1, Hist2h2aa1, Hist2h2aa2, Hist2h4
46	M25	chr4	4	qC7	108610059	108850077	26	0.424869	0	0.424869	5.581e-21	Rab3b, Nrd1, Osbpl9
47	M25	chr4	4	qD2.1	118775893	119049312	26	0.343194	0	0.343194	2.524e-14	Slc2a1, Zfp691, Ermap, Ccdc23, 4930538K18Rik, AU022252, Lepre1, Cldn19, Ybx1, Ppih, Ccdc30
50	M25	chr4	4	qD3	135709886	135886915	19	0.522634	0	0.522634	8.627e-22	E2f2, Asap3, Tcea3, Zfp46, Hnrnpr
51	M25	chr5	5	qC3.3	74493276	74512562	3	0.877472	0	0.877472	3.137e-11
52	M25	chr5	5	qF	123251244	123313445	7	0.837482	0	0.837482	7.357e-22	Anapc5, Rnf34
53	M25	chr5	5	qF	124783126	125070939	26	0.349385	0	0.349385	8.826e-15	2810006K23Rik, Cdk2ap1, Sbno1, Setd8, Rilpl2, Snrnp35, Rilpl1, Tmed2, Ddx55, Eif2b1, Gtf2h3, Tctn2
55	M25	chr5	5	qG2	138053731	138141235	12	1.08308	0	1.08308	9.593e-57	Fbxo24, Lrch4, Sap25, Irs3, Agfg2
59	M25	chr6	6	qC3	85292696	85416197	12	0.44694	0	0.44694	1.356e-11	Rab11fip5, Noto, Smyd5, 1700040I03Rik, Cct7
60	M25	chr6	6	qE3	112981299	113329710	40	0.319527	0	0.319527	1.695e-18	Thumpd3, Gt(ROSA)26Sor, Setd5, Lhfpl4, Mtmr14, Cpne9, Brpf1, Ogg1, Camk1, Tada3l, Arpc4
62	M25	chr7	7	qA1	3552752	3649707	10	0.549329	0	0.549329	3.848e-14	Oscar, Ndufa3, Tfpt, Prpf31, Cnot3, Leng1, Tmc4, Mboat7, Tsen34
63	M25	chr7	7	qA1	4688857	4825141	14	0.77575	0	0.77575	4.024e-36	Suv420h2, Cox6b2, 4930401F20Rik, Il11, Tmem190, 2210411K11Rik, Rpl28, Ube2s, D430041B17Rik, Isoc2b
64	M25	chr7	7	qA1	13422605	13626353	21	0.449899	0	0.449899	3.546e-19	Zfp110, Zfp128, Zscan22, Rps5, 2310014L17Rik, Zfp324, Zfp446, Slc27a5, Zbtb45, Trim28, Chmp2a, Ube2m
65	M25	chr7	7	qA3	19653533	20314658	71	0.442348	0	0.442348	9.223e-58	Rshl1, Dmwd, Dmpk, Six5, Fbxo46, Qpctl, Snrpd2, Gipr, Eml2, Gpr4, Opa3, Vasp, C79127, Rtn2, Fosb, Ercc1, Cd3eap, Ppp1r13l, Ercc2, Klc3, Ckm, Mark4, Bloc1s3, Trappc6a, Nkpd1, Lrrc68, Gemin7, Zfp296, Sfrs16, Relb, Clptm1, Apoc2, Apoc4, Apoc1, Apoe, Tomm40, Pvrl2
66	M25	chr7	7	qA3	26007497	26072479	7	1.0674	0	1.0674	1.002e-33	Zfp526, Gsk3a, Erf, Cic
67	M25	chr7	7	qA3	26480622	26536738	6	0.788066	0	0.788066	6.172e-17	Tgfb1, Ccdc97, Hnrnpul1
68	M25	chr7	7	qA3	27953239	28370374	41	0.326483	0	0.326483	1.154e-19	Rab4b, Mia1, Snrpa, Itpkc, Adck4, Numbl, Ltbp4, Shkbp1, Spnb4, Blvrb, Sertad3, Sertad1, Prx, Hipk4, Pld3, 2310022A10Rik
69	M25	chr7	7	qA3	29136478	29603148	48	0.372867	0	0.372867	5.098e-29	Rps16, Gm10079, LOC100302567, Plekhg2, Zfp36, Med29, Paf1, Samd4b, Gmfg, Lrfn1, Il28a, Il28b, Sycn, Nccrp1, Pak4, C330005M16Rik, Fbxo27, Fbxo17, Mrps12, Sars2, Nfkbib, Sirt2, Rinl, Hnrnpl
70	M25	chr7	7	qB1	31019945	31134228	13	0.772858	0	0.772858	1.897e-33	Wdr62, Clip3, Alkbh6, AI428936, Sdhaf1
71	M25	chr7	7	qB1	31316157	31433496	16	0.546094	0	0.546094	2.684e-21	Snx26, BC053749, Hspb6, Lin37, Psenen, U2af1l4, Tmem149, Wbp7, Zbtb32, Upk1a, Cox6b1, Etv2, Rbm42
75	M25	chr7	7	qF5	150455411	150832863	41	0.272703	0	0.272703	3.074e-14	Kcnq1, Kcnq1ot1, Cdkn1c, Slc22a18, Phlda2, Nap1l4, Cars, Tnfrsf26, Tnfrsf22
77	M25	chr8	8	qB3.3	72158714	72363938	18	0.522415	0	0.522415	1.898e-12	Zfp869, D330038O06Rik, Atp13a1, Gmip, Lpar2, Pbx4
78	M25	chr8	8	qB3.3	73179890	73370169	20	0.476536	0	0.476536	6.011e-11	Pgpep1, Lsm4, Jund, Pde4c, Rab3a, Mpv17l2, Ifi30, Pik3r2, Il12rb1, Arrdc2, Kcnn1
79	M25	chr8	8	qC2 - qC3	86062345	86786228	68	0.530784	0	0.530784	2.481e-79	Olfr370, Ndufb7, Tecr, Dnajb1, Gipc1, Ptger1, Pkn1, Ddx39, Cd97, Lphn1, Asf1b, Prkaca, Samd1, 1700067K01Rik, 4432412L15Rik, Il27ra, Rln3, Rfx1, Dcaf15, Podnl1, Cc2d1a, 4930432K21Rik, Nanos3, Zswim4, D8Ertd738e, Mri1, Ccdc130
83	M25	chr9	9	qA3	20856727	21236076	42	0.436822	0	0.436822	2.802e-20	Glp1, Fdx1l, Raver1, Tyk2, Cdc37, Pde4a, Keap1, S1pr5, Atg4d, Kri1, Cdkn2d, Ap1m2, Slc44a2, Ilf3, Qtrt1, Dnm2
85	M25	chr9	9	qA5.2	44106748	44185261	9	0.947828	0	0.947828	9.795e-35	Hinfp, C2cd2l, Dpagt1, H2afx, Hmbs, Vps11
86	M25	chr9	9	qB	56793679	56960044	17	0.398761	0	0.398761	7.65e-16	Snupn, Ptpn9, Sin3a
88	M25	chr10	10	qC1	75198171	75532642	34	0.375817	0	0.375817	2.352e-21	Cabin1, Ddt, Gstt3, Gstt1, Gstt4, Gstt2, Mif, Derl3, Smarcb1, Mmp11, Chchd10, Vpreb3, Gm5134, Zfp280b, Slc5a4b
89	M25	chr10	10	qC1	79310794	81758681	209	0.323691	0	0.323691	9.606e-90	Ptbp1, BC005764, Prtn3, Ela2, Cfd, Med16, C030046I01Rik, Kiss1r, Arid3a, Wdr18, Grin3b, ORF61, Cnn2, Abca7, Hmha1, Polr2e, Gpx4, Sbno2, Stk11, Dos, Atp5d, Midn, Cirbp, 1600002K03Rik, Efna2, Mum1, Ndufs7, Gamt, Dazap1, Rps15, Apc2, 2310011J03Rik, Pcsk4, Reep6, Adamtsl5, Plk5, Mex3d, Mbd3, Uqcr, Tcfe2a, Onecut3, Atp8b3, Rexo1, Klf16, Fam108a, Adat3, Scamp4, Csnk1g2, Btbd2, Mknk2, Mobkl2a, 9030607L1…
90	M25	chr10	10	qC1	79448762	79688301	26	0.647209	0	0.647209	9.722e-13	Cnn2, Abca7, Hmha1, Polr2e, Gpx4, Sbno2, Stk11, Dos, Atp5d, Midn, Cirbp, 1600002K03Rik, Efna2
92	M25	chr10	10	qD3	127684108	128334299	64	0.489463	0	0.489463	5.296e-64	Timeless, Apon, Apof, Stat2, Il23a, Usp52, Cnpy2, Cs, Coq10a, Ankrd52, Slc39a5, Obfc2b, Rnf41, Smarcc2, Myl6, Myl6b, Esyt1, Zc3h10, Rpl41, Pa2g4, Erbb3, Rps26, Ikzf4, Suox, Rab5b, Cdk2, Si, Dgka, Wibg, Mmp19, 1110012D08Rik, Dnajc14, Ormdl2, Sarnp, Gdf11
93	M25	chr11	11	qA1	4030407	4111741	11	0.422531	0	0.422531	8.289e-10	Rnf215, Ccdc157, Sf3a1, Tbc1d10a
97	M25	chr11	11	qB1.3	50088411	50193323	12	0.480122	0	0.480122	4.128e-13	Maml1, Canx, Hnrnph1
98	M25	chr11	11	qB1.3	58667480	58766426	10	0.567086	0	0.567086	5.94e-15	2810021J22Rik, Zfp39, Butr1, Hist3h2ba
99	M25	chr11	11	qB3	68752914	68919294	17	0.712561	0	0.712561	7.096e-37	Arhgef15, Slc25a35, Rangrf, Gm4535, Pfas, 1500010J02Rik, Aurkb, 2310047M10Rik, Tmem107, Vamp2, Per1
100	M25	chr11	11	qB3	69545863	69805761	26	0.385655	0	0.385655	1.308e-17	Polr2a, Amac1, Zbtb4, Chrnb1, Fgf11, Tmem102, G630025P09Rik, 4933402P03Rik, Spem1, Nlgn2, 1810027O10Rik, Plscr3, Tnk1, Kctd11, Centb1, 2810408A11Rik, Neurl4, Gps2, Eif5a, Ybx2, Slc2a4, Cldn7, Rai12, Dullard, Gabarap
101	M25	chr11	11	qB4	70752304	70923577	17	0.504363	0	0.504363	2.25e-19	Rabep1, Nup88, Rpain, C1qbp, Dhx33, Derl2, Mis12, 6330403K07Rik, Nlrp1a
102	M25	chr11	11	qB5	75108007	75388896	28	0.487474	0	0.487474	6.071e-29	Rpa1, Smyd4, Serpinf1, Serpinf2, Wdr81, Tlcd2, Prpf8, Rilp, Scarf1, Slc43a2
106	M25	chr11	11	qD	95154099	95250832	12	0.516232	0	0.516232	7.032e-15	Myst2, Fam117a, Slc35b1
107	M25	chr11	11	qD	96655766	96861085	20	0.859464	0	0.859464	8.565e-61	Cbx1, Nfe2l1, Copz2, Cdk5rap3, Atad4, Pnpo, D030028A08Rik, Sp2
109	M25	chr11	11	qD	100779807	100988268	23	0.322307	0	0.322307	1.459e-11	Stat3, Ptrf, Atp6v0a1, Naglu, Hsd17b1, Coasy, Mlx, Psmc3ip, Fam134c, Tubg1
110	M25	chr11	11	qE1	102782644	103030339	25	0.418876	0	0.418876	1.08e-19	Kif18b, C1ql1, Dcakd, Nmt1, Plcd3, Acbd4, Hexim1, Hexim2
111	M25	chr11	11	qE1	105897499	106081504	20	0.643669	0	0.643669	1.469e-35	Dcaf7, Ccdc44, Map3k3, Limd2, Strada, Ccdc47, Ddx42
112	M25	chr11	11	qE2	117504217	117577026	10	0.309699	0	0.309699	3.748e-10	Tnrc6c
113	M25	chr11	11	qE2	118905794	118946210	5	0.779586	0	0.779586	3.792e-14	Cbx4
114	M25	chr11	11	qE2	119787886	120619902	83	0.513909	0	0.513909	3.754e-90	Baiap2, Aatk, Azi1, 2410002I01Rik, 1810043H04Rik, Slc38a10, Bahcc1, Actg1, Fscn2, 2310003H01Rik, Nploc4, Tspan10, Pde6g, 1810049H13Rik, Ccdc137, Arl16, Hgs, Mrpl12, Slc25a10, Gcgr, BC003940, Dysfip1, P4hb, Arhgdia, Thoc4, Anapc11, Npb, Pcyt2, Sirt7, Mafg, Pycr1, Myadml2, Notum, Aspscr1, Stra13, Lrrc45, Rac3, Dcxr, Cbr2
117	M25	chr12	12	qC3	72073255	72121590	5	0.627395	0	0.627395	7.959e-10	Psma3, Arid4a
119	M25	chr12	12	qD2	87163978	87202530	5	0.637874	0	0.637874	4.236e-10	0610007P14Rik, Ttll5
123	M25	chr13	13	qA3.1	21813250	21921804	11	1.01771	0	1.01771	4.616e-47	Hist1h2bm, Hist1h4j, Hist1h4k, Hist1h2ak, Hist1h2bn, Hist1h1b, Hist1h3i, Hist1h2an, Hist1h2bp, LOC665622, OTTMUSG00000013203, Hist1h2ao, Hist1h4m
125	M25	chr13	13	qA3.1	23648864	23847542	22	0.878153	0	0.878153	6.556e-69	Hist1h1d, Hist1h3e, Hist1h2ae, Hist1h2bg, Hist1h2bf, Hist1h2ad, Hist1h3d, Hist1h4d, Hist1h2be, Hist1h1e, Hist1h2ac, Hist1h2bc, Hist1h1t, Hist1h4c, Hfe, Hist1h1c, Hist1h3c, Hist1h2bb, Hist1h2ab, Hist1h3b
127	M25	chr14	14	qC1	45829177	45992834	18	0.422397	0	0.422397	6.186e-15	Txndc16, Gpr137c, Ero1l, Psmc6, Styx
134	M25	chr14	14	qC3	56160682	56213555	8	0.677966	0	0.677966	7.74e-17	Pck2, Dcaf11, Fitm1, Psme1, Fam158a, Psme2, Rnf31
136	M25	chr15	15	qD3	76456657	76537831	10	0.458094	0	0.458094	2.303e-10	Nfkbil2, Cyhr1, Kifc2, Foxh1, Ppp1r16a, Gpt, Mfsd3, Recql4
138	M25	chr15	15	qE1	79515033	79572112	6	0.695293	0	0.695293	1.161e-13	Josd1, Gtpbp1, Unc84b
139	M25	chr15	15	qE1	81437837	82221284	78	0.262508	0	0.262508	9.783e-24	Ep300, L3mbtl2, Rangap1, Zc3h7b, Tef, Tob2, Phf5a, Aco2, Polr3h, Csdc2, Pmm1, 1700029P11Rik, Pppde2, Xrcc6, Nhp2l1, Ccdc134, Srebf2, Tnfrsf13c, Cenpm, Sept3, Wbp2nl, Naga, Fam109b, 1500032L24Rik, Ndufa6, Cyp2d22, Cyp2d11
140	M25	chr15	15	qF1	98711137	98893849	15	0.389171	0	0.389171	4.444e-11	Rhebl1, Dhh, Lmbr1l, Tuba1b, Tuba1a, Tuba1c, Prph
143	M25	chr15	15	qF3	102224632	102368167	15	0.686838	0	0.686838	1.174e-30	Sp1, Amhr2, Prr13, Pcbp2, Map3k12, Tarbp2, Npff, Atf7
144	M25	chr15	15	qF3	103051412	103126464	8	0.706089	0	0.706089	1.095e-17	Cbx5, Hnrnpa1, Gm10052, Gm5643, Nfe2, Copz1
146	M25	chr16	16	qC3.3	91598617	91720599	14	0.608914	0	0.608914	5.284e-23	Dnajc28, Gart, Son, Donson, Cryzl1
147	M25	chr17	17	qA3.3	24582588	24725770	15	0.597691	0	0.597691	1.1e-23	E4f1, Pgp, Mlst8, 9930021D14Rik, Caskin1, Traf7, Rab26, Pkd1
148	M25	chr17	17	qA3.3	24959233	25149304	23	0.767469	0	0.767469	8.307e-57	4930528F23Rik, Fahd1, Hagh, Igfals, Nubp2, Spsb3, Eme2, Mrps34, Nme3, Mapk8ip3, Hn1l, Cramp1l
149	M25	chr17	17	qA3.3	25847070	26063433	23	0.355385	0	0.355385	1.115e-13	Gng13, Chtf18, Rpusd1, Mslnl, Msln, Narfl, Haghl, Fam173a, Metrn, Wdr24, Jmjd8, Stub1, Rhbdl1, Rhot2, Wdr90, 9530058B02Rik, 0610011F06Rik, Wfikkn1, Rab40c, Gm10012, Pigq
150	M25	chr17	17	qA3.3	27067800	27139396	8	0.504093	0	0.504093	4.298e-10	Kifc1, Phf1, Cuta, Zbtb9
151	M25	chr17	17	qB1	34744070	34780986	5	0.997096	0	0.997096	4.121e-16	Agpat1, Egfl8, Ppt2, Prrt1
152	M25	chr17	17	qC	46825132	46916057	12	0.546354	0	0.546354	1.892e-16	Ppp2r5d, Pex6, Gnmt, Cnpy3, Ptcra, 2310039H08Rik, Rpl7l1
153	M25	chr17	17	qD	56022622	57194349	122	0.38729	0	0.38729	1.05e-75	BC011426, BC031441, Ebi3, Ccdc94, Shd, Fsd1, Stap2, Mpnd, Sh3gl1, Chaf1a, Ubxn6, Hdgfrp2, S3-12, 2310076L09Rik, Lrg1, Sema6b, Tnfaip8l1, D17Wsu104e, Dpp9, Fem1a, Ticam1, M6prbp1, Arrdc5, Uhrf1, Kdm4b, Ptprs, Znrf4, Safb2, Safb, 2410015M20Rik, Rpl36, Lonp1, Ranbp3, AI662250, Ndufa11, Nrtn, Dus3l, Rfx2, Acsbg2, 1700061G19Rik, Mllt1, Acer1, Clpp, Alkbh7, Pspn, Gtf2f1, Khsrp, Slc25a41, Slc25a23
154	M25	chr18	18	qB1	34761157	35134214	39	0.359778	0	0.359778	2.01e-22	Brd8, Kif20a, Cdc23, Gfra3, Cdc25c, Fam53c, Kdm3b, Reep2, Egr1, Etf1, Hspa9
155	M25	chr19	19	qA	3756960	4974372	127	0.343912	0	0.343912	1.196e-62	Suv420h1, Chka, Tcirg1, Ndufs8, Aldh3b1, Unc93b1, Acy3, Tbx10, Nudt8, Doc2g, Ndufv1, Gstp1, Gstp2, BC021614, Cabp2, Cdk2ap2, Pitpnm1, Aip, Tmem134, Cabp4, Gpr152, Coro1b, Ptprcap, Rps6kb2, Tbc1d10c, Ppp1ca, Rad9, Clcf1, Pold4, Ssh3, Ankrd13d, Adrbk1, Kdm2a, Rhod, Syt12, 2010003K11Rik, Pcx, Lrfn4, Rce1, Spnb3, Rbm4b, Rbm4, Rbm14, Ccs, Ccdc87, Ctsf, Actn3, Zdhhc24, Bbs1, Dpp3, Peli3, Mrpl11
157	M25	chr19	19	qA	5990950	6412025	44	0.361202	0	0.361202	3.087e-25	Capn1, Syvn1, Mrpl49, Fau, Znhit2, Tm7sf2, 1110014N23Rik, BC048609, Zfpl1, Cdca5, Naaladl1, Sac3d1, Snx15, Arl2, Batf2, Gpha2, Ppp2r5b, Atg2a, Ehd1, Cdc42bpg, Men1, Map4k2, Sf1, Pygm, Rasgrp2
158	M25	chr19	19	qA	7042155	7109861	9	0.930153	0	0.930153	1.992e-33	Plcb3, Ppp1r14b, Fkbp2, Vegfb, Dnajc4, Nudt22, Trpt1, Fermt3, Stip1
159	M25	chr19	19	qA	8819802	9038759	25	0.595698	0	0.595698	6.272e-38	Stx5a, Nxf1, Tmem223, Tmem179b, Gm2518, Taf6l, Polr2g, Zbtb3, Ttc9c, Hnrnpul2, Gng3, Bscl2, Lrrn4cl, Ubxn1, AI462493, 5730408K05Rik, 1810009A15Rik, Ints5, Ganab, B3gat3, Rom1, Eml3, Mta2, Tut1
160	M25	chr19	19	qC3	41909502	42198945	31	0.424159	0	0.424159	1.421e-24	Frat2, Rrp12, Pgam1, Exosc1, Zdhhc16, Mms19, Ubtd1, Ankrd2, Dhdpsl, 4933411K16Rik, Morn4, Pi4k2a, Avpi1
162	M25	chr19	19	qC3	46152863	46893200	84	0.264225	0	0.264225	9.687e-26	Nolc1, Elovl3, Pitx3, Gbf1, Nfkb2, Psd, Fbxl15, Cuedc2, Tmem180, Actr1a, Sufu, Trim8, Arl3, Sfxn2, D19Wsu162e, Cyp17a1, 2010012O05Rik, As3mt, Cnnm2
163	M25	chrX	X	qA1.1	7129853	7763099	66	0.426523	0	0.426523	2.02e-50	Ppp1r3f, Foxp3, Ccdc22, Cacna1f, Syp, Prickle3, Plp2, Magix, Gpkow, Wdr45, Praf2, Ccdc120, Tcfe3, Gripap1, Kcnd1, Otud5, Pim2, Slc35a2, Pqbp1, Timm17b, Pcsk1n, Eras, Hdac6, Gata1, Glod5, Suv39h1, Was, EG627782, Wdr13, Rbm3, Tbc1d25, Ebp
164	M25	chrX	X	qA1.3	20232130	20565345	33	0.369671	0	0.369671	1.63e-19	Uba1, Pctk1, Usp11, Araf, Syn1, Timp1, Cfp, Elk1, Uxt, A230072C01Rik
165	M25	chrX	X	qA4	45452473	45717707	27	0.46607	0	0.46607	1.047e-25	Xpnpep2, Sash3, Zdhhc9, Utp14a, Bcorl1
166	M25	chrX	X	qD	98508150	98791186	29	0.447145	0	0.447145	3.09e-25	Nlgn3, Gjb1, Zmym3, Nono, Itgb1bp2, Taf1
167	M25	chrX	X	qF1	133256795	133358924	10	0.479552	0	0.479552	3.411e-11	Morf4l2, Glra4, Plp1
168	M25	chrX	X	qF3	148743603	148788786	5	0.796943	0	0.796943	8.68e-15	Tspyl2, Gpr173
