# Supplementary material for: Clonal copy-number mosaicism in autoreactive T lymphocytes in diabetic NOD mice
Source: Genome Res. 2019 Dec;29(12):1951–61. doi: 10.1101/gr.247882.118 (PMC6886509; doi:10.1101/gr.247882.118)
Supplement: Supplemental Material [file supp_gr.247882.118_Supplemental_Data_S4.xlsx]

## Sheet: Sheet1
# List of CNAs in memory lymphocytes from the popliteal lymph nodes of NOD and BALB/c mice infected with L. major.
NO.	ID	chrom	chrom	chr region	loc.start	loc.end	num.mark	Amplification	Deletions	mean LRR	pval	Genes
6479	Leish. BALB/c. 2	chr6	6	qB3	52116749	52217998	10	0	-0.595246	-0.595246	2.889e-14	Hoxa3, Hoxa4, Hoxa5, Hoxa6, Hoxa7, Hoxa9, Hoxa10, Hoxa11, Hoxa11as, Hoxa13
6488	Leish. BALB/c. 5	chr8	8	qE1	121550538	121579434	3	0.776536	0	0.776536	6.027e-10	Cdh13
6725	Leish. BALB/c. 6	chr2	2	qC3	74516368	74598078	11	0	-0.550485	-0.550485	1.124e-10	Hoxd11, Hoxd10, Hoxd9, Hoxd8, 1700109F18Rik, Hoxd3, Hoxd4
6730	Leish. BALB/c. 6	chr8	8	qC3	87143254	87559938	47	0	-0.28501	-0.28501	1.319e-11	Cacna1a, Ier2, Nacc1, Trmt1, Lyl1, Nfix, Dand5, Gadd45gip1, Rad23a, Calr, Farsa, Syce2, Gcdh, Klf1, Dnase2a, Mast1, Rtbdn, Rnaseh2a, Prdx2, Junb, Hook2, Best2, Asna1, 2310036O22Rik
6090	Leish. NOD 5	chr5	5	qG1.1	125559251	125638710	10	0	-0.377774	-0.377774	9.29e-11	Ncor2
6099	Leish. NOD 5	chr19	19	qA	3742078	3881787	16	0.359714	0	0.359714	3.82e-10	Suv420h1, Chka
6739	Leish. NOD 7	chr6	6	qB3	52104495	52207847	11	0	-0.475518	-0.475518	3.06e-10	Hoxa1, Hoxa2, Hoxa3, Hoxa4, Hoxa5, Hoxa6, Hoxa7, Hoxa9, Hoxa10, Hoxa11, Hoxa11as
