# Supplementary material for: Clonal copy-number mosaicism in autoreactive T lymphocytes in diabetic NOD mice
Source: Genome Res. 2019 Dec;29(12):1951–61. doi: 10.1101/gr.247882.118 (PMC6886509; doi:10.1101/gr.247882.118)
Supplement: Supplemental Material [file supp_gr.247882.118_Supplemental_Data_S5.xlsx]

## Sheet: Sheet1
# The percentage of the top three CD4+ T-cell clones per mouse in lymphocytes from PLNs of 10 NOD mice. Clones were determined on the basis of the highly random, non-template aa sequence in the CDR3 region. The sequence in red is shared by all mice.
	α Chain				β Chain
Mouse	CDR3	V	J	% reads	CDR3	V	J	D	% reads
A	CALSESSFSKLVF	TRAV6D-7*02	TRAJ50*01	2.56	CAWSPGGSAETLYF	TRBV31*01	TRBJ2-3*01	TRBD2*01	2.21
	CAASGSTNTGKLTF	TRAV7-4*01	TRAJ27*01	2.32	CASSRDRDREVFF	TRBV17*01	TRBJ1-1*01	TRBD1*01, TRBD2*01	1.15
	CVVGDRGSALGRLHF	TRAV11D*01, TRAV11*01	TRAJ18*01	0.4	CAASSNTDKVVF	TRBV2*01	TRBJ1-1*01	TRBD1*01	0.04
B	CVVGDRGSALGRLHF	TRAV11D*01, TRAV11*01	TRAJ18*01	0.71	CAWSPGGSAETLYF	TRBV31*01	TRBJ2-3*01	TRBD1*01	0.68
	CAAGGSALGRLHF	TRAV10D*01, TRAV10D*02	TRAJ18*01	0.59	CASSRDRDREVFF	TRBV17*01	TRBJ1-1*01	TRBD1*01, TRBD2*01	0.61
	CAVSNNNNAPRF	TRAV3-4*01	TRAJ43*01	0.4	CAASSNTDKVVF	TRBV2*01	TRBJ1-1*01	TRBD1*01	0.02
C	CAASRNYKYVF	TRAV14D-3/DV8*03	TRAJ40*01	0.96	CAASGGNNRIFF	TRBV2*01	TRBJ1-1*02, TRBJ1-1*01	TRBD1*01, TRBD2*01	0.59
	CVVGDRGSALGRLHF	TRAV11D*01, TRAV11*01	TRAJ18*01	0.94	CASSDWGSSYEQYF	TRBV13-3*01	TRBJ2-7*01	TRBD2*01	0.53
	CAVRPSDTNAYKVIF	TRAV3-4*01	TRAJ30*01	0.65	CAASSNTDKVVF	TRBV2*01	TRBJ1-1*01	TRBD1*01	0.02
D	CAASGNTNTGKLTF	TRAV7-4*01	TRAJ27*01	5.29	CASSQRLGGIAEQFF	TRBV5*01	TRBJ2-1*01	TRBD2*01	2.07
	CVVGDRGSALGRLHF	TRAV11D*01, TRAV11*01	TRAJ18*01	2.12	CASSFQGAGQFF	TRBV15*01	TRBJ2-1*01	TRBD1*01	1.89
	CAASWNMGYKLTF	TRAV10*01	TRAJ9*01	1.82	CAASSNTDKVVF	TRBV2*01	TRBJ1-1*01	TRBD1*01	0.35
E	CVVGDRGSALGRLHF	TRAV11D*01, TRAV11*01	TRAJ18*01	1.1	CASSLTGGEQYF	TRBV15*01	TRBJ2-7*01	TRBD1*01	0.32
	CALEGAGGADRLTF	TRAV17*01	TRAJ45*01	0.3	CASGDANSPLYF	TRBV13-2*01	TRBJ2-5*01	TRBD1*01, TRBD2*01	0.26
	CAMANNNAGAKLTF	TRAV13D-4*01, TRAV13N-4*01	TRAJ39*01	0.29	CAASSNTDKVVF	TRBV2*01	TRBJ1-1*01	TRBD1*01	0.19
F	CVVGDRGSALGRLHF	TRAV11D*01, TRAV11*01	TRAJ18*01	1.46	CAASSNTDKVVF	TRBV2*01	TRBJ1-1*01	TRBD1*01	0.4
	CAANTGGADRLTF	TRAV14D-1*02	TRAJ45*01	0.66	CALEGPGGSALGRLHF	TRBV12-1*01, TRBV12-1*02	TRBJ1-5*03	TRBD2*01	0.4
	CAAETGNTRKLIF	TRAV4D-3*01	TRAJ57*01	0.47	CASSLGDQDTQYF	TRBV14*01	TRBJ2-5*01	TRBD1*01, TRBD2*01	0.35
G	CAVSASMGYKLTF	TRAV9D-3*01	TRAJ9*01	0.3	CASSLAGLDAEQFF	TRBV15*01	TRBJ2-1*01	TRBD1*01, TRBD2*01	0.63
	CAASATSSGQKLVF	TRAV14D-3/DV8*05	TRAJ16*01	0.28	CASSDIQGAETLYF	TRBV13-3*01	TRBJ2-3*01	TRBD1*01	0.32
	CAMARNNYAQGLTF	TRAV13D-1*01	TRAJ26*01	0.26	CAASSNTDKVVF	TRBV2*01	TRBJ1-1*01	TRBD1*01	0.13
H	CVVGDRGSALGRLHF	TRAV11D*01, TRAV11*01	TRAJ18*01	1.46	CASRRQDQAPLF	TRBV15*01	TRBJ1-5*01	TRBD1*01	1.02
	CAMERGGGSGNKLIF	TRAV13D-1*01	TRAJ32*02	0.32	CASRTGTGGPGQLYF	TRBV15*01	TRBJ2-2*01	TRBD2*01	0.25
	CAASKGGNYKYVF	TRAV14D-3/DV8*03	TRAJ40*01	0.24	CAASSNTDKVVF	TRBV2*01	TRBJ1-1*01	TRBD1*01	0.09
I	CALSENTGANTGKLTF	TRAV6D-7*02	TRAJ52*01	4.19	CASSLGQGDTEVFF	TRBV4*01	TRBJ1-1*01	TRBD1*01	3.93
	CALSPPQGGRALIF	TRAV6-5*01, TRAV6-5*02	TRAJ15*01	4.19	CASSYWGNQDTQYF	TRBV13-3*01	TRBJ2-5*01	TRBD2*01	2.42
	CVVGDRGSALGRLHF	TRAV11D*01, TRAV11*01	TRAJ18*01	1.35	CAASSNTDKVVF	TRBV2*01	TRBJ1-1*01	TRBD1*01	0.01
J	CVVGDRGSALGRLHF	TRAV11D*01, TRAV11*01	TRAJ18*01	1.81	CASRYRGRNTEVFF	TRBV14*01	TRBJ1-1*01	TRBD1*01	0.67
	CAVSEGGYKVVF	TRAV3D-3*01	TRAJ12*01	1.46	CASSRRRDTGQLYF	TRBV13-3*01	TRBJ2-2*01	TRBD1*01	0.46
	CAATGANTGKLTF	TRAV14-1*02	TRAJ52*01	0.67	CAASSNTDKVVF	TRBV2*01	TRBJ1-1*01	TRBD1*01	0.12
